# Supplementary material for: Revealing fine-scale spatiotemporal differences in SARS-CoV-2 introduction and spread
Source: PubMed Central journal article supplement (PMC7609670; doi:10.1038/s41467-020-19346-z), 2020-11-03
Supplement: 41467_2020_19346_MOESM1_ESM.pdf [file 41467_2020_19346_MOESM1_ESM.pdf]

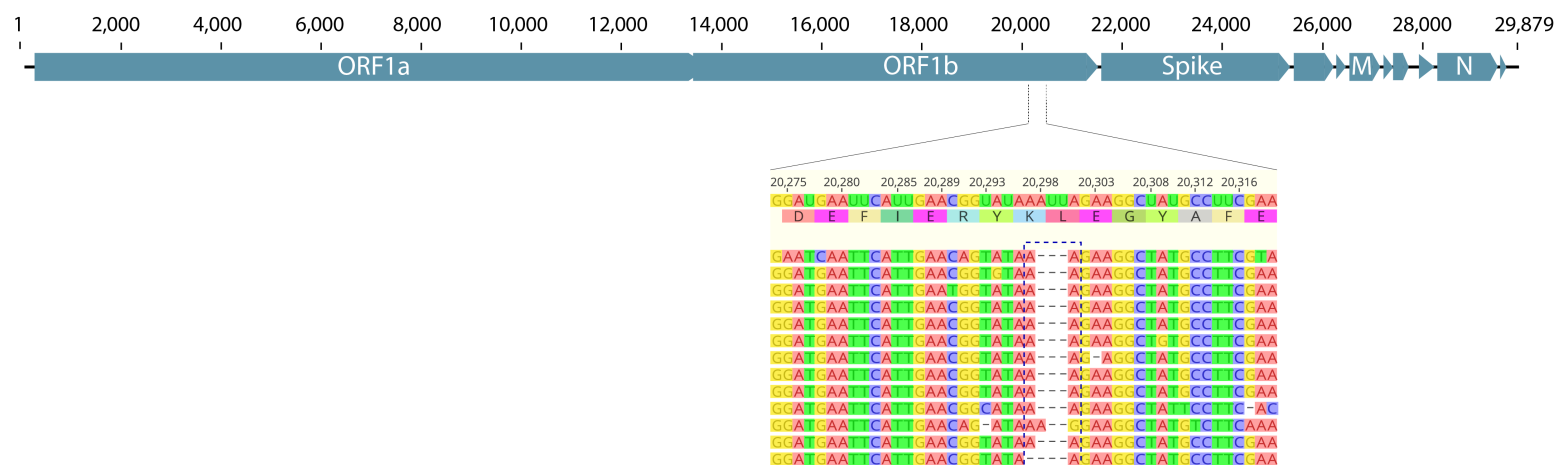

**Supplementary Figure 1. Diagnostic deletion in the index Dane County sample**  
 Consensus-level deletion identified in the Dane County index sample. Zoomed in panel shows nucleotide and amino acid identities of the in-frame deletion.

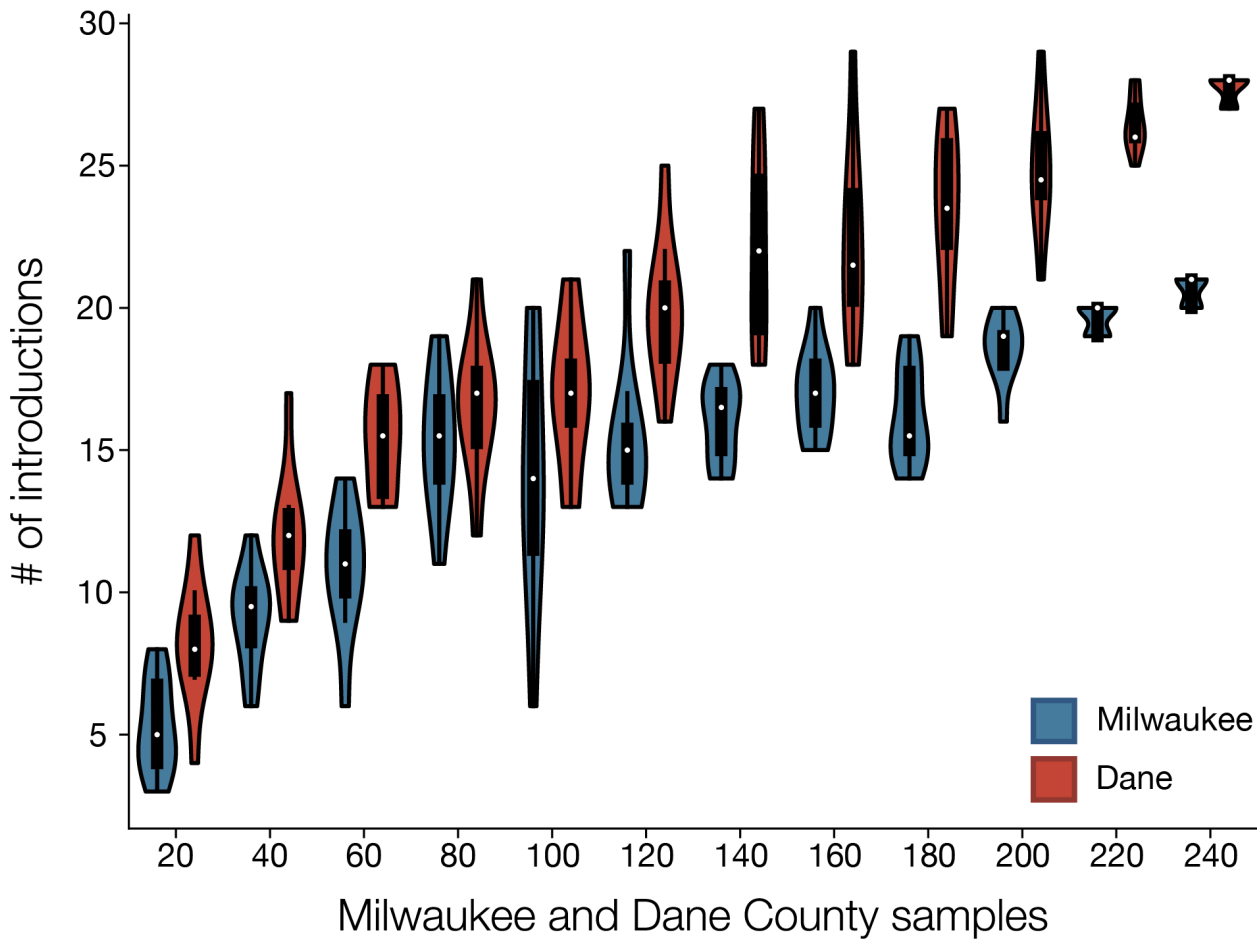

**Supplementary Figure 2. Sampling sensitivity of estimates for the number of introductions into Dane and Milwaukee Counties.** Estimates of the number of introductions into Dane and Milwaukee Counties using a time aligned maximum likelihood phylogeny. N sequences (x-axis) were randomly sampled from the available Dane and Milwaukee County samples and the remaining were pruned from the tree. Ten replicates of each N were conducted and the number of introductions (y-axis) was estimated for each. For each number of Milwaukee and Dane County samples, the kernel density estimate of the underlying distribution of the number of introductions is shown. The bandwidth is calculated using Scott's rule and the distribution is only shown over the range of observed values 76 Internal boxes (black) represent the interquartile range (IQR, 25th to 75th percentile) of the distribution and the median is represented by a white dot. Whiskers extend to the range of data that are not more than 1.5 times the IQR above the upper or below the lower quartile. Source data to replicate this figure can be found in the Source Data file.

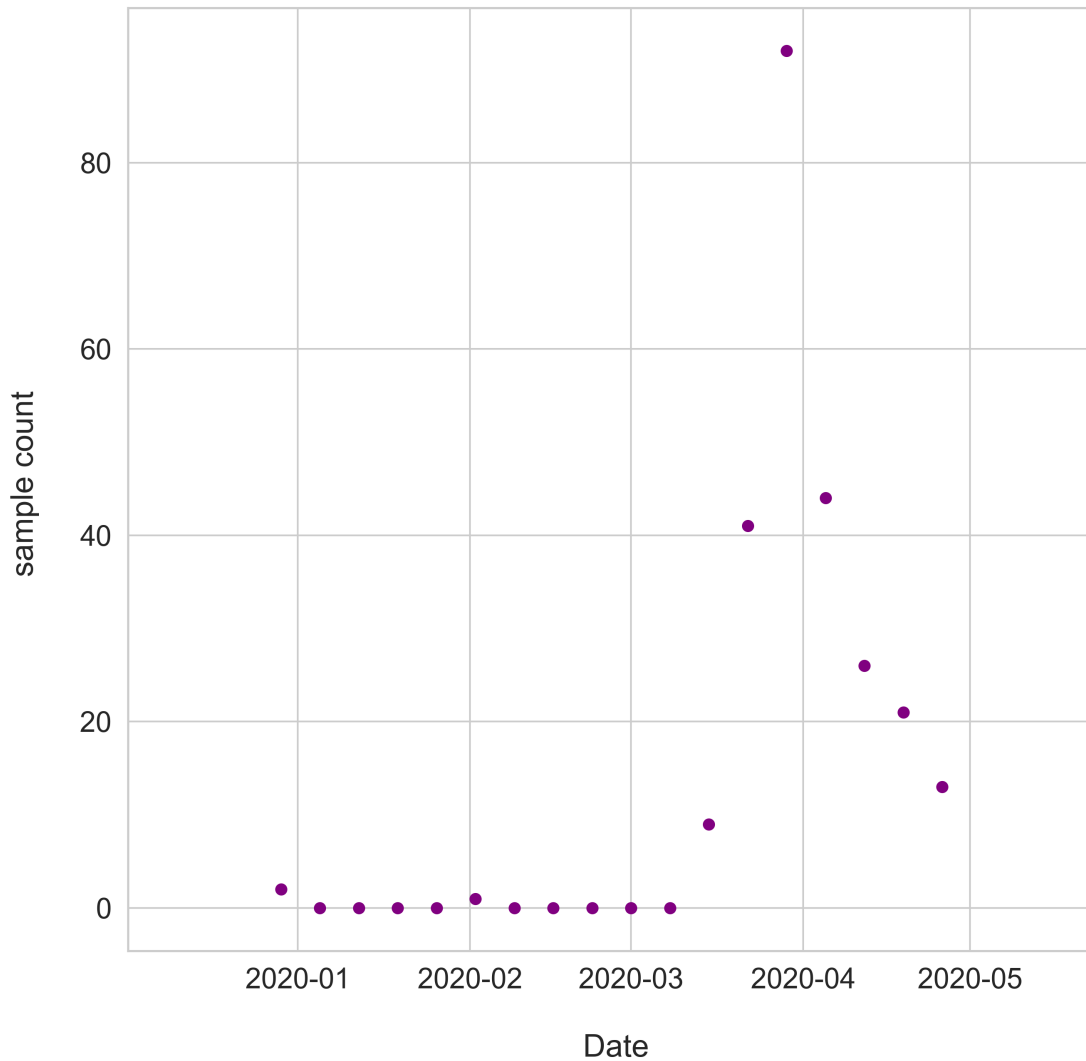

**Supplementary Figure 3. Temporal distribution of SARS-CoV-2 samples.** The total count of samples collected (y-axis) during 1-week intervals (x-axis) from the first documented Wisconsin case through 18 April, 2020. Weeks with no confirmed cases within the defined study period are also shown here as indicated by data points at  $y=0$ . Source data to replicate this figure can be found in the Source Data file. Code to recreate this figure can be found in the GitHub repository – ``data_raw/supplementary_figure_3.ipynb``.

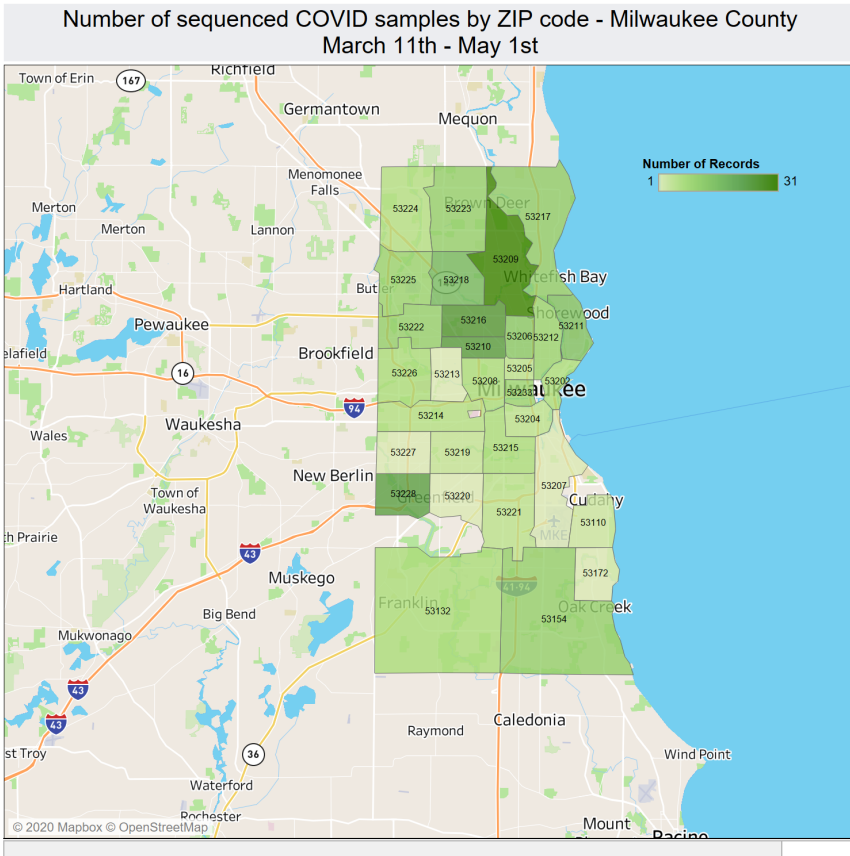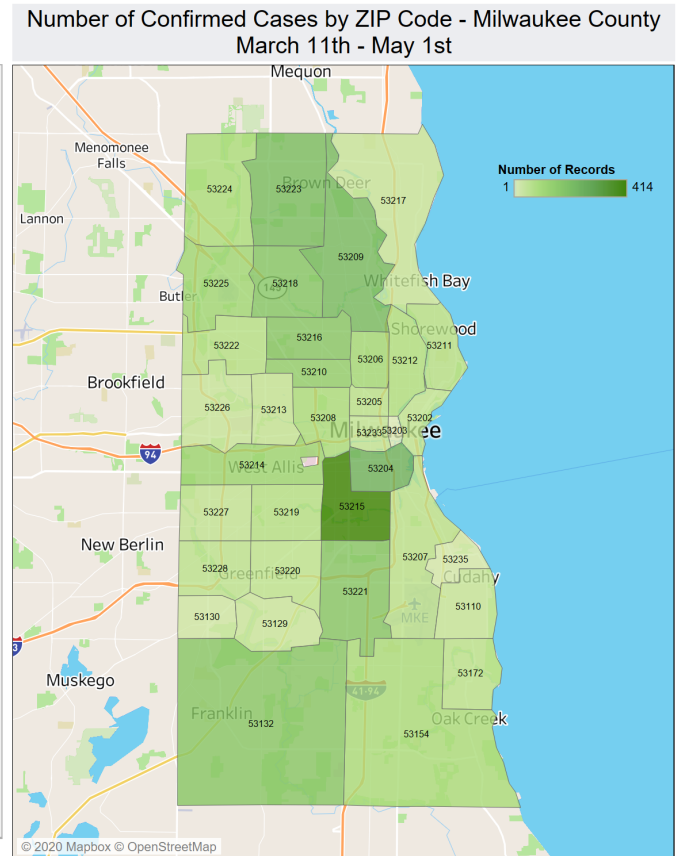

**Supplementary Figure 4. Geographic distribution of Milwaukee County sequences (left) compared to test positive cases (right) by zip code.** Case count data were collated using the Wisconsin Electronic Disease Surveillance System (WEDSS) and data were sorted and plotted using Tableau (<https://www.tableau.com/>) to create counts and color gradients by ZIP code.

| Division                      | Number of sequences | Number of positive SARS-CoV-2 cases | Percent sequenced (%) |
|-------------------------------|---------------------|-------------------------------------|-----------------------|
| England                       | 23212               | 265,849                             | 8.73                  |
| Wales                         | 5425                | 17389                               | 31.2                  |
| Scotland                      | 5121                | 18847                               | 27.17                 |
| Washington                    | 3957                | 55600                               | 7.12                  |
| California                    | 2189                | 500600                              | 0.44                  |
| Victoria                      | 1522                | 13469                               | 11.3                  |
| New York                      | 1505                | 411600                              | 0.37                  |
| Michigan                      | 1069                | 86200                               | 1.24                  |
| Wisconsin                     | 963                 | 52900                               | 1.82                  |
| Louisiana                     | 786                 | 116300                              | 0.68                  |
| Singapore                     | 770                 | 54555                               | 1.41                  |
| Denmark                       | 735                 | 14306                               | 5.14                  |
| Northern Ireland              | 717                 | 6049                                | 11.85                 |
| Netherlands                   | 692                 | 56381                               | 1.23                  |
| Utah                          | 688                 | 32400                               | 2.12                  |
| New South Wales               | 656                 | 3832                                | 17.12                 |
| Portugal                      | 642                 | 52061                               | 1.23                  |
| British Columbia              | 604                 | 3834                                | 15.75                 |
| Reykjavik                     | 601                 | 1932                                | 31.11                 |
| Florida                       | 560                 | 469800                              | 0.12                  |
| Basque Country                | 559                 | 15634                               | 3.58                  |
| Minnesota                     | 545                 | 54300                               | 1                     |
| Virginia                      | 522                 | 89900                               | 0.58                  |
| Gujarat                       | 447                 | 66777                               | 0.67                  |
| Massachusetts                 | 418                 | 117200                              | 0.36                  |
| Dane County - April 26th      | 122                 | 405                                 | 30.12                 |
| Milwaukee County - April 26th | 125                 | 2629                                | 4.75                  |

**Supplemental Table 1. SARS-CoV-2 sequencing depth per admin division.** Admin division is defined as the state or country. Percent sequenced (%) is calculated as the number of consensus sequences over the number of documented positive SARS-CoV-2 cases across a variety of geographic locations as of July 31, 2020. The number of sequences per geographic location were obtained on GISAID by downloading the NextMeta file and filtering on the 'Admin Division' search field. We compared the sequencing depth to the sequencing depth obtained by our study (indicated by '- April 26th') to highlight that we are one of the top 25 deepest sequenced divisions.

| Location                                 | Number of sequences | Number of positive SARS-CoV-2 cases | Percent sequenced (%) |
|------------------------------------------|---------------------|-------------------------------------|-----------------------|
| Yakima County                            | 1704                | 9971                                | 17.09                 |
| San Diego                                | 702                 | 29577                               | 2.37                  |
| Sydney                                   | 543                 | 3809                                | 14.26                 |
| East Baton Rouge Parish                  | 424                 | 11263                               | 3.76                  |
| Manhattan                                | 419                 | 222522                              | 0.19                  |
| Brooklyn                                 | 373                 | 61948                               | 0.6                   |
| Valencia                                 | 343                 | 12999                               | 2.64                  |
| Dane County                              | 334                 | 4145                                | 8.06                  |
| King County                              | 322                 | 15946                               | 2.02                  |
| Greater Houston Area                     | 320                 | 80914                               | 0.4                   |
| Santa Clara County                       | 313                 | 11128                               | 2.81                  |
| Donostia-San Sebastian & Vitoria-Gasteiz | 535                 | 15634                               | 3.42                  |
| Wuhan                                    | 257                 | 68138                               | 0.38                  |
| Nassau County                            | 202                 | 43482                               | 0.46                  |
| Snohomish County                         | 187                 | 6033                                | 3.1                   |
| Orange County                            | 184                 | 38131                               | 0.48                  |
| Munich                                   | 181                 | 51068                               | 0.35                  |
| Queens                                   | 175                 | 67598                               | 0.26                  |
| South Yorkshire                          | 171                 | 9610                                | 1.78                  |
| San Francisco                            | 163                 | 7231                                | 2.25                  |
| Pierce County                            | 159                 | 5851                                | 2.72                  |
| Milwaukee County                         | 153                 | 19332                               | 0.79                  |
| Los Angeles County                       | 146                 | 198355                              | 0.07                  |
| Hyderabad                                | 144                 | 73050                               | 0.2                   |
| Dane County - April 26th                 | 122                 | 405                                 | 30.12                 |
| Milwaukee County - April 26th            | 125                 | 2629                                | 4.75                  |

**Supplemental Table 2. SARS-CoV-2 sequencing depth per location.** Percent sequenced (%) is calculated as the number of consensus sequences over the number of documented positive SARS-CoV-2 cases across a variety of geographic locations. The number of sequences per geographic location were obtained on GISAID by downloading the NextMeta file and filtering on the 'Location' search field. We compared the sequencing depth to the sequencing depth obtained by our study (indicated by '- April 26th') to highlight that we are one of the top 25 deepest sequenced locations.

| strain            | gisaid_epi_isl | genbank_accession | sra_accession | srr_run_number | biosample_id | bioproject  | date      | region        | country | division  | location    | region_exposure | country_exposure | division_exposure | segment | length | title                                                                           | paper_url                                                                                                   | date_submitted | N1_Ct_value | N2_Ct_value |
|-------------------|----------------|-------------------|---------------|----------------|--------------|-------------|-----------|---------------|---------|-----------|-------------|-----------------|------------------|-------------------|---------|--------|---------------------------------------------------------------------------------|-------------------------------------------------------------------------------------------------------------|----------------|-------------|-------------|
| USA/WI1/2020      | EPI_ISL_408670 | MT039887          | SRX7777165    | SRR11140745    | SAMN14154204 | PRJNA607948 | 2020-1-31 | North America | USA     | Wisconsin | Dane county | Asia            | China            | Hubei             | genome  | 29879  | First 12 patients with coronavirus disease 2019 (COVID-19) in the United States | <a href="https://dx.doi.org/10.1101/2020.03.09.20032896">https://dx.doi.org/10.1101/2020.03.09.20032896</a> | 2020-2-10      | -           | -           |
| USA/WI-UW-02/2020 | EPI_ISL_416489 | -                 | SRX7972381    | SRR11393278    | SAMN14428237 | PRJNA614504 | 2020-3-15 | North America | USA     | Wisconsin | Dane county | North America   | USA              | Wisconsin         | genome  | 29782  | ?                                                                               | ?                                                                                                           | 2020-3-22      | 14.75       | 13.53       |
| USA/WI-UW-04/2020 | EPI_ISL_416491 | -                 | SRX7972383    | SRR11393276    | SAMN14428239 | PRJNA614504 | 2020-3-15 | North America | USA     | Wisconsin | Dane county | North America   | USA              | Wisconsin         | genome  | 29843  | ?                                                                               | ?                                                                                                           | 2020-3-22      | 24.93       | 25.4        |
| USA/WI-UW-05/2020 | EPI_ISL_416492 | -                 | SRX7972384    | SRR11393275    | SAMN14428240 | PRJNA614504 | 2020-3-15 | North America | USA     | Wisconsin | Dane county | North America   | USA              | Wisconsin         | genome  | 29855  | ?                                                                               | ?                                                                                                           | 2020-3-22      | 24.71       | 25.03       |
| USA/WI-UW-03/2020 | EPI_ISL_416523 | -                 | SRX7972382    | SRR11393277    | SAMN14428238 | PRJNA614504 | 2020-3-14 | North America | USA     | Wisconsin | Dane county | North America   | USA              | Wisconsin         | genome  | 29870  | ?                                                                               | ?                                                                                                           | 2020-3-22      | 15.66       | 15          |
| USA/WI-UW-06/2020 | EPI_ISL_417200 | -                 | SRX7988797    | SRR11410125    | SAMN14443954 | PRJNA614504 | 2020-3-21 | North America | USA     | Wisconsin | Dane county | North America   | USA              | Wisconsin         | genome  | 29844  | ?                                                                               | ?                                                                                                           | 2020-3-24      | 26.53       | 27.29       |
| USA/WI-UW-07/2020 | EPI_ISL_417201 | -                 | SRX7988798    | SRR11410124    | SAMN14443955 | PRJNA614504 | 2020-3-21 | North America | USA     | Wisconsin | Dane county | North America   | USA              | Wisconsin         | genome  | 29865  | ?                                                                               | ?                                                                                                           | 2020-3-24      | 16.28       | 16.49       |
| USA/WI-UW-08/2020 | EPI_ISL_417202 | -                 | SRX7988799    | SRR11410123    | SAMN14443956 | PRJNA614504 | 2020-3-21 | North America | USA     | Wisconsin | Dane county | North America   | USA              | Wisconsin         | genome  | 29843  | ?                                                                               | ?                                                                                                           | 2020-3-24      | 17.35       | 18.03       |
| USA/WI-UW-09/2020 | EPI_ISL_417203 | -                 | SRX7988800    | SRR11410122    | SAMN14443957 | PRJNA614504 | 2020-3-21 | North America | USA     | Wisconsin | Dane county | North America   | USA              | Wisconsin         | genome  | 29843  | ?                                                                               | ?                                                                                                           | 2020-3-24      | 22.46       | 23.15       |
| USA/WI-UW-10/2020 | EPI_ISL_417204 | -                 | SRX7988801    | SRR11410121    | SAMN14443958 | PRJNA614504 | 2020-3-21 | North America | USA     | Wisconsin | Dane county | North America   | USA              | Wisconsin         | genome  | 29841  | ?                                                                               | ?                                                                                                           | 2020-3-24      | 24.17       | 24.51       |
| USA/WI-UW-25/2020 | EPI_ISL_421283 | -                 | SRX8079441    | SRR11507378    | SAMN14555931 | PRJNA614504 | 2020-3-23 | North America | USA     | Wisconsin | Dane county | North America   | USA              | Wisconsin         | genome  | 29782  | ?                                                                               | ?                                                                                                           | 2020-4-2       | 14.18       | 14.34       |
| USA/WI-UW-26/2020 | EPI_ISL_421284 | -                 | SRX8079442    | SRR11507377    | SAMN14555932 | PRJNA614504 | 2020-3-24 | North America | USA     | Wisconsin | Dane county | North America   | USA              | Wisconsin         | genome  | 29611  | ?                                                                               | ?                                                                                                           | 2020-4-2       | 27.55       | 29.14       |
| USA/WI-UW-27/2020 | EPI_ISL_421285 | -                 | SRX8079453    | SRR11507366    | SAMN14555933 | PRJNA614504 | 2020-3-25 | North America | USA     | Wisconsin | Dane county | North America   | USA              | Wisconsin         | genome  | 29782  | ?                                                                               | ?                                                                                                           | 2020-4-2       | 30.36       | 31.89       |
| USA/WI-UW-28/2020 | EPI_ISL_421286 | -                 | SRX8079464    | SRR11507355    | SAMN14555934 | PRJNA614504 | 2020-3-25 | North America | USA     | Wisconsin | Dane county | North America   | USA              | Wisconsin         | genome  | 29782  | ?                                                                               | ?                                                                                                           | 2020-4-2       | 27.7        | 29.21       |
| USA/WI-UW-29/2020 | EPI_ISL_421287 | -                 | SRX8079475    | SRR11507344    | SAMN14555935 | PRJNA614504 | 2020-3-24 | North America | USA     | Wisconsin | Dane county | North America   | USA              | Wisconsin         | genome  | 29782  | ?                                                                               | ?                                                                                                           | 2020-4-2       | 16.14       | 16.05       |
| USA/WI-UW-31/2020 | EPI_ISL_421289 | -                 | SRX8079497    | SRR11507322    | SAMN14555937 | PRJNA614504 | 2020-3-25 | North America | USA     | Wisconsin | Dane county | North America   | USA              | Wisconsin         | genome  | 29782  | ?                                                                               | ?                                                                                                           | 2020-4-2       | 15.46       | 15.69       |
| USA/WI-UW-32/2020 | EPI_ISL_421290 | -                 | SRX8079498    | SRR11507321    | SAMN14555938 | PRJNA614504 | 2020-3-24 | North America | USA     | Wisconsin | Dane county | North America   | USA              | Wisconsin         | genome  | 29782  | ?                                                                               | ?                                                                                                           | 2020-4-2       | 24.27       | 24.83       |
| USA/WI-UW-33/2020 | EPI_ISL_421291 | -                 | SRX8079499    | SRR11507320    | SAMN14555939 | PRJNA614504 | 2020-3-23 | North America | USA     | Wisconsin | Dane county | North America   | USA              | Wisconsin         | genome  | 29782  | ?                                                                               | ?                                                                                                           | 2020-4-2       | 23.18       | 23.94       |
| USA/WI-UW-34/2020 | EPI_ISL_421292 | -                 | SRX8079500    | SRR11507319    | SAMN14555940 | PRJNA614504 | 2020-3-26 | North America | USA     | Wisconsin | Dane county | North America   | USA              | Wisconsin         | genome  | 29782  | ?                                                                               | ?                                                                                                           | 2020-4-2       | 27.81       | 29.4        |
| USA/WI-UW-35/2020 | EPI_ISL_421293 | -                 | SRX8079443    | SRR11507376    | SAMN14555941 | PRJNA614504 | 2020-3-24 | North America | USA     | Wisconsin | Dane county | North America   | USA              | Wisconsin         | genome  | 29782  | ?                                                                               | ?                                                                                                           | 2020-4-2       | 20.93       | 21.61       |
| USA/WI-UW-37/2020 | EPI_ISL_421295 | -                 | SRX8079445    | SRR11507374    | SAMN14555943 | PRJNA614504 | 2020-3-22 | North America | USA     | Wisconsin | Dane county | North America   | USA              | Wisconsin         | genome  | 29782  | ?                                                                               | ?                                                                                                           | 2020-4-2       | 23.69       | 24.79       |

| Study ID          | Accession      | Sex | SRX ID     | SRR ID      | SAMN ID      | PRJNA ID    | Collection Date | Country       | State | County    | Region       | Country       | State | County    | Genome | Size (Mb) | Year | Year | Year     | Mean  | SD    |
|-------------------|----------------|-----|------------|-------------|--------------|-------------|-----------------|---------------|-------|-----------|--------------|---------------|-------|-----------|--------|-----------|------|------|----------|-------|-------|
| USA/WI-UW-38/2020 | EPI_ISL_421296 | -   | SRX8079446 | SRR11507373 | SAMN14555944 | PRJNA614504 | 2020-3-25       | North America | USA   | Wisconsin | Dane county  | North America | USA   | Wisconsin | genome | 29782     | ?    | ?    | 2020-4-2 | 27.98 | 29.23 |
| USA/WI-UW-39/2020 | EPI_ISL_421297 | -   | SRX8079447 | SRR11507372 | SAMN14555945 | PRJNA614504 | 2020-3-22       | North America | USA   | Wisconsin | Dane county  | North America | USA   | Wisconsin | genome | 29782     | ?    | ?    | 2020-4-2 | 18.2  | 20.06 |
| USA/WI-UW-40/2020 | EPI_ISL_421298 | -   | SRX8079448 | SRR11507371 | SAMN14555946 | PRJNA614504 | 2020-3-24       | North America | USA   | Wisconsin | Dane county  | North America | USA   | Wisconsin | genome | 29782     | ?    | ?    | 2020-4-2 | 23.52 | 24.46 |
| USA/WI-UW-41/2020 | EPI_ISL_421299 | -   | SRX8079449 | SRR11507370 | SAMN14555947 | PRJNA614504 | 2020-3-25       | North America | USA   | Wisconsin | Dane county  | North America | USA   | Wisconsin | genome | 29782     | ?    | ?    | 2020-4-2 | 24.32 | 25.31 |
| USA/WI-UW-42/2020 | EPI_ISL_421300 | -   | SRX8079450 | SRR11507369 | SAMN14555948 | PRJNA614504 | 2020-3-18       | North America | USA   | Wisconsin | Dane county  | North America | USA   | Wisconsin | genome | 29782     | ?    | ?    | 2020-4-2 | 16.29 | 16.82 |
| USA/WI-UW-43/2020 | EPI_ISL_421301 | -   | SRX8079451 | SRR11507368 | SAMN14555949 | PRJNA614504 | 2020-3-19       | North America | USA   | Wisconsin | Dane county  | North America | USA   | Wisconsin | genome | 29782     | ?    | ?    | 2020-4-2 | 14.76 | 15.72 |
| USA/WI-UW-44/2020 | EPI_ISL_421302 | -   | SRX8079452 | SRR11507367 | SAMN14555950 | PRJNA614504 | 2020-3-17       | North America | USA   | Wisconsin | Dane county  | North America | USA   | Wisconsin | genome | 29782     | ?    | ?    | 2020-4-2 | 17.79 | 18.3  |
| USA/WI-UW-45/2020 | EPI_ISL_421303 | -   | SRX8079454 | SRR11507365 | SAMN14555951 | PRJNA614504 | 2020-3-22       | North America | USA   | Wisconsin | Dane county  | North America | USA   | Wisconsin | genome | 29782     | ?    | ?    | 2020-4-2 | 20.22 | 20.7  |
| USA/WI-UW-46/2020 | EPI_ISL_421304 | -   | SRX8079455 | SRR11507364 | SAMN14555952 | PRJNA614504 | 2020-3-22       | North America | USA   | Wisconsin | Dane county  | North America | USA   | Wisconsin | genome | 29782     | ?    | ?    | 2020-4-2 | 27.13 | 27.94 |
| USA/WI-UW-48/2020 | EPI_ISL_421306 | -   | SRX8079457 | SRR11507362 | SAMN14555954 | PRJNA614504 | 2020-3-25       | North America | USA   | Wisconsin | Dane county  | North America | USA   | Wisconsin | genome | 29782     | ?    | ?    | 2020-4-2 | 23.02 | 23.79 |
| USA/WI-UW-49/2020 | EPI_ISL_421307 | -   | SRX8079458 | SRR11507361 | SAMN14555955 | PRJNA614504 | 2020-3-25       | North America | USA   | Wisconsin | Dane county  | North America | USA   | Wisconsin | genome | 29782     | ?    | ?    | 2020-4-2 | 25.7  | 26.9  |
| USA/WI-UW-50/2020 | EPI_ISL_421308 | -   | SRX8079459 | SRR11507360 | SAMN14555956 | PRJNA614504 | 2020-3-25       | North America | USA   | Wisconsin | Green County | North America | USA   | Wisconsin | genome | 29782     | ?    | ?    | 2020-4-2 | 19.13 | 19.78 |
| USA/WI-UW-51/2020 | EPI_ISL_421309 | -   | SRX8079460 | SRR11507359 | SAMN14555957 | PRJNA614504 | 2020-3-20       | North America | USA   | Wisconsin | Dane county  | North America | USA   | Wisconsin | genome | 29782     | ?    | ?    | 2020-4-2 | 17.11 | 17.3  |
| USA/WI-UW-52/2020 | EPI_ISL_421310 | -   | SRX8079461 | SRR11507358 | SAMN14555958 | PRJNA614504 | 2020-3-18       | North America | USA   | Wisconsin | Dane county  | North America | USA   | Wisconsin | genome | 29782     | ?    | ?    | 2020-4-2 | 15.98 | 16.57 |
| USA/WI-UW-53/2020 | EPI_ISL_421311 | -   | SRX8079462 | SRR11507357 | SAMN14555959 | PRJNA614504 | 2020-3-18       | North America | USA   | Wisconsin | Dane county  | North America | USA   | Wisconsin | genome | 29782     | ?    | ?    | 2020-4-2 | 14.46 | 14.85 |
| USA/WI-UW-54/2020 | EPI_ISL_421312 | -   | SRX8079463 | SRR11507356 | SAMN14555960 | PRJNA614504 | 2020-3-20       | North America | USA   | Wisconsin | Dane county  | North America | USA   | Wisconsin | genome | 29782     | ?    | ?    | 2020-4-2 | 16.12 | 16.18 |
| USA/WI-UW-55/2020 | EPI_ISL_421313 | -   | SRX8079465 | SRR11507354 | SAMN14555961 | PRJNA614504 | 2020-3-23       | North America | USA   | Wisconsin | Dane county  | North America | USA   | Wisconsin | genome | 29782     | ?    | ?    | 2020-4-2 | 16.85 | 17.81 |
| USA/WI-UW-56/2020 | EPI_ISL_421314 | -   | SRX8079466 | SRR11507353 | SAMN14555962 | PRJNA614504 | 2020-3-18       | North America | USA   | Wisconsin | Dane county  | North America | USA   | Wisconsin | genome | 29782     | ?    | ?    | 2020-4-2 | 24.33 | 24.95 |
| USA/WI-UW-58/2020 | EPI_ISL_421316 | -   | SRX8079468 | SRR11507351 | SAMN14555964 | PRJNA614504 | 2020-3-23       | North America | USA   | Wisconsin | Dane county  | North America | USA   | Wisconsin | genome | 29782     | ?    | ?    | 2020-4-2 | 16.63 | 16.64 |
| USA/WI-UW-59/2020 | EPI_ISL_421317 | -   | SRX8079469 | SRR11507350 | SAMN14555965 | PRJNA614504 | 2020-3-24       | North America | USA   | Wisconsin | Dane county  | North America | USA   | Wisconsin | genome | 29782     | ?    | ?    | 2020-4-2 | 23.83 | 24.54 |
| USA/WI-UW-60/2020 | EPI_ISL_421318 | -   | SRX8079470 | SRR11507349 | SAMN14555966 | PRJNA614504 | 2020-3-19       | North America | USA   | Wisconsin | Dane county  | North America | USA   | Wisconsin | genome | 29782     | ?    | ?    | 2020-4-2 | 16.48 | 16.48 |
| USA/WI-UW-61/2020 | EPI_ISL_421319 | -   | SRX8079471 | SRR11507348 | SAMN14555967 | PRJNA614504 | 2020-3-23       | North America | USA   | Wisconsin | Dane county  | North America | USA   | Wisconsin | genome | 29782     | ?    | ?    | 2020-4-2 | 23.28 | 24.11 |
| USA/WI-UW-62/2020 | EPI_ISL_421320 | -   | SRX8079472 | SRR11507347 | SAMN14555968 | PRJNA614504 | 2020-3-25       | North America | USA   | Wisconsin | Dane county  | North America | USA   | Wisconsin | genome | 29782     | ?    | ?    | 2020-4-2 | 26.29 | 27.46 |
| USA/WI-UW-63/2020 | EPI_ISL_421321 | -   | SRX8079473 | SRR11507346 | SAMN14555969 | PRJNA614504 | 2020-3-24       | North America | USA   | Wisconsin | Dane county  | North America | USA   | Wisconsin | genome | 29782     | ?    | ?    | 2020-4-2 | 24.54 | 25.21 |
| USA/WI-UW-64/2020 | EPI_ISL_421322 | -   | SRX8079474 | SRR11507345 | SAMN14555970 | PRJNA614504 | 2020-3-24       | North America | USA   | Wisconsin | Dane county  | North America | USA   | Wisconsin | genome | 29782     | ?    | ?    | 2020-4-2 | 17.96 | 17.57 |



| Accession         | ISL ID         | Sex | SRX ID     | SRR ID      | SAMN ID      | PRJNA ID    | Submission Date | Country       | State | County    | Region      | Country       | County | Genome Type | Size (Mb) | Year  | Year | Year | Year      | Year  | Year  |
|-------------------|----------------|-----|------------|-------------|--------------|-------------|-----------------|---------------|-------|-----------|-------------|---------------|--------|-------------|-----------|-------|------|------|-----------|-------|-------|
| USA/WI-UW-65/2020 | EPI_ISL_421323 | -   | SRX8079476 | SRR11507343 | SAMN14555971 | PRJNA614504 | 2020-3-22       | North America | USA   | Wisconsin | Dane county | North America | USA    | Wisconsin   | genome    | 29782 | ?    | ?    | 2020-4-2  | 15.54 | 15.33 |
| USA/WI-UW-66/2020 | EPI_ISL_421324 | -   | SRX8079477 | SRR11507342 | SAMN14555972 | PRJNA614504 | 2020-3-24       | North America | USA   | Wisconsin | Dane county | North America | USA    | Wisconsin   | genome    | 29782 | ?    | ?    | 2020-4-2  | 26.52 | 27.61 |
| USA/WI-UW-67/2020 | EPI_ISL_421325 | -   | SRX8079478 | SRR11507341 | SAMN14555973 | PRJNA614504 | 2020-3-25       | North America | USA   | Wisconsin | Dane county | North America | USA    | Wisconsin   | genome    | 29782 | ?    | ?    | 2020-4-2  | 25.62 | 27.01 |
| USA/WI-UW-68/2020 | EPI_ISL_421326 | -   | SRX8079479 | SRR11507340 | SAMN14555974 | PRJNA614504 | 2020-3-24       | North America | USA   | Wisconsin | Dane county | North America | USA    | Wisconsin   | genome    | 29782 | ?    | ?    | 2020-4-2  | 15.96 | 16.13 |
| USA/WI-UW-69/2020 | EPI_ISL_421327 | -   | SRX8079480 | SRR11507339 | SAMN14555975 | PRJNA614504 | 2020-3-19       | North America | USA   | Wisconsin | Dane county | North America | USA    | Wisconsin   | genome    | 29782 | ?    | ?    | 2020-4-2  | 15.83 | 16.07 |
| USA/WI-UW-70/2020 | EPI_ISL_421328 | -   | SRX8079481 | SRR11507338 | SAMN14555976 | PRJNA614504 | 2020-3-19       | North America | USA   | Wisconsin | Dane county | North America | USA    | Wisconsin   | genome    | 29782 | ?    | ?    | 2020-4-2  | 20.12 | 20.77 |
| USA/WI-UW-71/2020 | EPI_ISL_421329 | -   | SRX8079482 | SRR11507337 | SAMN14555977 | PRJNA614504 | 2020-3-24       | North America | USA   | Wisconsin | Dane county | North America | USA    | Wisconsin   | genome    | 29782 | ?    | ?    | 2020-4-2  | 18.93 | 18.64 |
| USA/WI-UW-72/2020 | EPI_ISL_421330 | -   | SRX8079483 | SRR11507336 | SAMN14555978 | PRJNA614504 | 2020-3-25       | North America | USA   | Wisconsin | Dane county | North America | USA    | Wisconsin   | genome    | 29782 | ?    | ?    | 2020-4-2  | 20.95 | 21.64 |
| USA/WI-UW-73/2020 | EPI_ISL_421331 | -   | SRX8079484 | SRR11507335 | SAMN14555979 | PRJNA614504 | 2020-3-24       | North America | USA   | Wisconsin | Dane county | North America | USA    | Wisconsin   | genome    | 29782 | ?    | ?    | 2020-4-2  | 23.69 | 24.93 |
| USA/WI-UW-74/2020 | EPI_ISL_421332 | -   | SRX8079485 | SRR11507334 | SAMN14555980 | PRJNA614504 | 2020-3-20       | North America | USA   | Wisconsin | Dane county | North America | USA    | Wisconsin   | genome    | 29782 | ?    | ?    | 2020-4-2  | 14.19 | 14.36 |
| USA/WI-UW-75/2020 | EPI_ISL_421333 | -   | SRX8079487 | SRR11507332 | SAMN14555981 | PRJNA614504 | 2020-3-26       | North America | USA   | Wisconsin | Dane county | North America | USA    | Wisconsin   | genome    | 29782 | ?    | ?    | 2020-4-2  | 29.8  | 31.35 |
| USA/WI-UW-76/2020 | EPI_ISL_421334 | -   | SRX8079488 | SRR11507331 | SAMN14555982 | PRJNA614504 | 2020-3-22       | North America | USA   | Wisconsin | Dane county | North America | USA    | Wisconsin   | genome    | 29782 | ?    | ?    | 2020-4-2  | 17.49 | 17.59 |
| USA/WI-UW-77/2020 | EPI_ISL_421335 | -   | SRX8079489 | SRR11507330 | SAMN14555983 | PRJNA614504 | 2020-3-19       | North America | USA   | Wisconsin | Dane county | North America | USA    | Wisconsin   | genome    | 29782 | ?    | ?    | 2020-4-2  | 20.19 | 20.65 |
| USA/WI-UW-78/2020 | EPI_ISL_421336 | -   | SRX8079490 | SRR11507329 | SAMN14555984 | PRJNA614504 | 2020-3-24       | North America | USA   | Wisconsin | Dane county | North America | USA    | Wisconsin   | genome    | 29782 | ?    | ?    | 2020-4-2  | 25.99 | 26.68 |
| USA/WI-UW-79/2020 | EPI_ISL_421338 | -   | SRX8079491 | SRR11507328 | SAMN14555985 | PRJNA614504 | 2020-3-23       | North America | USA   | Wisconsin | Dane county | North America | USA    | Wisconsin   | genome    | 29782 | ?    | ?    | 2020-4-2  | 25.04 | 25.84 |
| USA/WI-UW-80/2020 | EPI_ISL_421339 | -   | SRX8079492 | SRR11507327 | SAMN14555986 | PRJNA614504 | 2020-3-24       | North America | USA   | Wisconsin | Dane county | North America | USA    | Wisconsin   | genome    | 29782 | ?    | ?    | 2020-4-2  | 21.56 | 22.09 |
| USA/WI-UW-81/2020 | EPI_ISL_421340 | -   | SRX8079493 | SRR11507326 | SAMN14555987 | PRJNA614504 | 2020-3-25       | North America | USA   | Wisconsin | Dane county | North America | USA    | Wisconsin   | genome    | 29782 | ?    | ?    | 2020-4-2  | 21.88 | 23.08 |
| USA/WI-UW-82/2020 | EPI_ISL_421341 | -   | SRX8079494 | SRR11507325 | SAMN14555988 | PRJNA614504 | 2020-3-25       | North America | USA   | Wisconsin | Dane county | North America | USA    | Wisconsin   | genome    | 29782 | ?    | ?    | 2020-4-2  | 28.13 | 29.11 |
| USA/WI-UW-84/2020 | EPI_ISL_421343 | -   | SRX8079496 | SRR11507323 | SAMN14555990 | PRJNA614504 | 2020-3-24       | North America | USA   | Wisconsin | Dane county | North America | USA    | Wisconsin   | genome    | 29782 | ?    | ?    | 2020-4-2  | 23.12 | 23.82 |
| USA/WI-UW-85/2020 | EPI_ISL_425142 | -   | SRX8114902 | SRR11544850 | SAMN14596861 | PRJNA614504 | 2020-4-2        | North America | USA   | Wisconsin | Dane county | North America | USA    | Wisconsin   | genome    | 29782 | ?    | ?    | 2020-4-12 | 24.4  | -     |
| USA/WI-UW-86/2020 | EPI_ISL_425143 | -   | SRX8114903 | SRR11544849 | SAMN14596862 | PRJNA614504 | 2020-4-2        | North America | USA   | Wisconsin | Dane county | North America | USA    | Wisconsin   | genome    | 29782 | ?    | ?    | 2020-4-12 | 22.1  | -     |
| USA/WI-UW-87/2020 | EPI_ISL_425144 | -   | SRX8114914 | SRR11544838 | SAMN14596863 | PRJNA614504 | 2020-4-2        | North America | USA   | Wisconsin | Dane county | North America | USA    | Wisconsin   | genome    | 29782 | ?    | ?    | 2020-4-12 | 22.1  | -     |
| USA/WI-UW-88/2020 | EPI_ISL_425145 | -   | SRX8114925 | SRR11544827 | SAMN14596864 | PRJNA614504 | 2020-4-5        | North America | USA   | Wisconsin | Dane county | North America | USA    | Wisconsin   | genome    | 29782 | ?    | ?    | 2020-4-12 | 25.29 | 25.93 |
| USA/WI-UW-89/2020 | EPI_ISL_425146 | -   | SRX8114931 | SRR11544821 | SAMN14596865 | PRJNA614504 | 2020-3-31       | North America | USA   | Wisconsin | Dane county | North America | USA    | Wisconsin   | genome    | 29782 | ?    | ?    | 2020-4-12 | 21.63 | 22.3  |
| USA/WI-UW-90/2020 | EPI_ISL_425147 | -   | SRX8114932 | SRR11544820 | SAMN14596866 | PRJNA614504 | 2020-4-3        | North America | USA   | Wisconsin | Dane county | North America | USA    | Wisconsin   | genome    | 29782 | ?    | ?    | 2020-4-12 | 30.7  | -     |

|                    |                |   |            |             |              |             |           |               |     |           |             |               |     |           |        |       |   |   |           |       |       |
|--------------------|----------------|---|------------|-------------|--------------|-------------|-----------|---------------|-----|-----------|-------------|---------------|-----|-----------|--------|-------|---|---|-----------|-------|-------|
| USA/WI-UW-91/2020  | EPI_ISL_425148 | - | SRX8114933 | SRR11544819 | SAMN14596867 | PRJNA614504 | 2020-4-1  | North America | USA | Wisconsin | Dane county | North America | USA | Wisconsin | genome | 29611 | ? | ? | 2020-4-12 | 24.6  | -     |
| USA/WI-UW-92/2020  | EPI_ISL_425149 | - | SRX8114934 | SRR11544818 | SAMN14596868 | PRJNA614504 | 2020-3-30 | North America | USA | Wisconsin | Dane county | North America | USA | Wisconsin | genome | 29782 | ? | ? | 2020-4-12 | 18.8  | 19.7  |
| USA/WI-UW-93/2020  | EPI_ISL_425150 | - | SRX8114935 | SRR11544817 | SAMN14596869 | PRJNA614504 | 2020-4-4  | North America | USA | Wisconsin | Dane county | North America | USA | Wisconsin | genome | 29782 | ? | ? | 2020-4-12 | 25.7  | -     |
| USA/WI-UW-94/2020  | EPI_ISL_425151 | - | SRX8114936 | SRR11544816 | SAMN14596870 | PRJNA614504 | 2020-3-30 | North America | USA | Wisconsin | Dane county | North America | USA | Wisconsin | genome | 29782 | ? | ? | 2020-4-12 | 28.8  | -     |
| USA/WI-UW-95/2020  | EPI_ISL_425152 | - | SRX8114904 | SRR11544848 | SAMN14596871 | PRJNA614504 | 2020-3-30 | North America | USA | Wisconsin | Dane county | North America | USA | Wisconsin | genome | 29782 | ? | ? | 2020-4-12 | 21.2  | -     |
| USA/WI-UW-96/2020  | EPI_ISL_425153 | - | SRX8114905 | SRR11544847 | SAMN14596872 | PRJNA614504 | 2020-4-1  | North America | USA | Wisconsin | Dane county | North America | USA | Wisconsin | genome | 29782 | ? | ? | 2020-4-12 | 17.33 | 18.05 |
| USA/WI-UW-97/2020  | EPI_ISL_425154 | - | SRX8114906 | SRR11544846 | SAMN14596873 | PRJNA614504 | 2020-3-30 | North America | USA | Wisconsin | Dane county | North America | USA | Wisconsin | genome | 29611 | ? | ? | 2020-4-12 | 27.3  | -     |
| USA/WI-UW-98/2020  | EPI_ISL_425155 | - | SRX8114907 | SRR11544845 | SAMN14596874 | PRJNA614504 | 2020-3-31 | North America | USA | Wisconsin | Dane county | North America | USA | Wisconsin | genome | 29782 | ? | ? | 2020-4-12 | 24.7  | -     |
| USA/WI-UW-99/2020  | EPI_ISL_425156 | - | SRX8114908 | SRR11544844 | SAMN14596875 | PRJNA614504 | 2020-4-2  | North America | USA | Wisconsin | Dane county | North America | USA | Wisconsin | genome | 29782 | ? | ? | 2020-4-12 | 18.8  | -     |
| USA/WI-UW-100/2020 | EPI_ISL_425157 | - | SRX8114909 | SRR11544843 | SAMN14596876 | PRJNA614504 | 2020-4-3  | North America | USA | Wisconsin | Dane county | North America | USA | Wisconsin | genome | 29782 | ? | ? | 2020-4-12 | 26.5  | -     |
| USA/WI-UW-101/2020 | EPI_ISL_425158 | - | SRX8114910 | SRR11544842 | SAMN14596877 | PRJNA614504 | 2020-3-31 | North America | USA | Wisconsin | Dane county | North America | USA | Wisconsin | genome | 29782 | ? | ? | 2020-4-12 | 16.9  | -     |
| USA/WI-UW-102/2020 | EPI_ISL_425159 | - | SRX8114911 | SRR11544841 | SAMN14596878 | PRJNA614504 | 2020-3-30 | North America | USA | Wisconsin | Dane county | North America | USA | Wisconsin | genome | 29782 | ? | ? | 2020-4-12 | 22.21 | 22.99 |
| USA/WI-UW-103/2020 | EPI_ISL_425160 | - | SRX8114912 | SRR11544840 | SAMN14596879 | PRJNA614504 | 2020-4-3  | North America | USA | Wisconsin | Dane county | North America | USA | Wisconsin | genome | 29782 | ? | ? | 2020-4-12 | 23.6  | -     |
| USA/WI-UW-105/2020 | EPI_ISL_425162 | - | SRX8114915 | SRR11544837 | SAMN14596881 | PRJNA614504 | 2020-3-30 | North America | USA | Wisconsin | Dane county | North America | USA | Wisconsin | genome | 29782 | ? | ? | 2020-4-12 | 25.21 | 26.49 |
| USA/WI-UW-106/2020 | EPI_ISL_425163 | - | SRX8114916 | SRR11544836 | SAMN14596882 | PRJNA614504 | 2020-3-30 | North America | USA | Wisconsin | Dane county | North America | USA | Wisconsin | genome | 29782 | ? | ? | 2020-4-12 | 17.83 | 18.58 |
| USA/WI-UW-107/2020 | EPI_ISL_425164 | - | SRX8114917 | SRR11544835 | SAMN14596883 | PRJNA614504 | 2020-3-31 | North America | USA | Wisconsin | Dane county | North America | USA | Wisconsin | genome | 29782 | ? | ? | 2020-4-12 | 24.2  | -     |
| USA/WI-UW-108/2020 | EPI_ISL_425165 | - | SRX8114918 | SRR11544834 | SAMN14596884 | PRJNA614504 | 2020-3-30 | North America | USA | Wisconsin | Dane county | North America | USA | Wisconsin | genome | 29782 | ? | ? | 2020-4-12 | 25.06 | 26.02 |
| USA/WI-UW-109/2020 | EPI_ISL_425166 | - | SRX8114919 | SRR11544833 | SAMN14596885 | PRJNA614504 | 2020-3-30 | North America | USA | Wisconsin | Dane county | North America | USA | Wisconsin | genome | 29782 | ? | ? | 2020-4-12 | 31.01 | 32.18 |
| USA/WI-UW-110/2020 | EPI_ISL_425167 | - | SRX8114920 | SRR11544832 | SAMN14596886 | PRJNA614504 | 2020-3-31 | North America | USA | Wisconsin | Dane county | North America | USA | Wisconsin | genome | 29782 | ? | ? | 2020-4-12 | 22.2  | -     |
| USA/WI-UW-111/2020 | EPI_ISL_425168 | - | SRX8114921 | SRR11544831 | SAMN14596887 | PRJNA614504 | 2020-3-31 | North America | USA | Wisconsin | Dane county | North America | USA | Wisconsin | genome | 29782 | ? | ? | 2020-4-12 | 25.61 | 26.29 |
| USA/WI-UW-112/2020 | EPI_ISL_425169 | - | SRX8114922 | SRR11544830 | SAMN14596888 | PRJNA614504 | 2020-3-30 | North America | USA | Wisconsin | Dane county | North America | USA | Wisconsin | genome | 29782 | ? | ? | 2020-4-12 | 18.74 | 19.89 |
| USA/WI-UW-114/2020 | EPI_ISL_425171 | - | SRX8114924 | SRR11544828 | SAMN14596890 | PRJNA614504 | 2020-3-30 | North America | USA | Wisconsin | Dane county | North America | USA | Wisconsin | genome | 29782 | ? | ? | 2020-4-12 | 22.62 | 23.5  |
| USA/WI-UW-115/2020 | EPI_ISL_425172 | - | SRX8114926 | SRR11544826 | SAMN14596891 | PRJNA614504 | 2020-3-31 | North America | USA | Wisconsin | Dane county | North America | USA | Wisconsin | genome | 29782 | ? | ? | 2020-4-12 | 26.2  | -     |
| USA/WI-UW-116/2020 | EPI_ISL_425173 | - | SRX8114927 | SRR11544825 | SAMN14596892 | PRJNA614504 | 2020-3-30 | North America | USA | Wisconsin | Dane county | North America | USA | Wisconsin | genome | 29782 | ? | ? | 2020-4-12 | 31.81 | 33.31 |
| USA/WI-UW-117/2020 | EPI_ISL_425174 | - | SRX8114928 | SRR11544824 | SAMN14596893 | PRJNA614504 | 2020-3-30 | North America | USA | Wisconsin | Dane county | North America | USA | Wisconsin | genome | 29782 | ? | ? | 2020-4-12 | 28.2  | -     |

|                    |                |   |            |             |              |             |           |               |     |           |                  |               |     |           |        |       |   |   |           |       |       |
|--------------------|----------------|---|------------|-------------|--------------|-------------|-----------|---------------|-----|-----------|------------------|---------------|-----|-----------|--------|-------|---|---|-----------|-------|-------|
| USA/WI-UW-119/2020 | EPI_ISL_425176 | - | SRX8114930 | SRR11544822 | SAMN14596895 | PRJNA614504 | 2020-4-10 | North America | USA | Wisconsin | Dane county      | North America | USA | Wisconsin | genome | 29782 | ? | ? | 2020-4-12 | 31.01 | 32.71 |
| USA/WI-UW-120/2020 | EPI_ISL_427427 | - | SRX8149929 | SRR11582218 | SAMN14654585 | PRJNA614504 | 2020-4-13 | North America | USA | Wisconsin | Dane county      | North America | USA | Wisconsin | genome | 29782 | ? | ? | 2020-4-18 | 14.76 | 14.82 |
| USA/WI-UW-122/2020 | EPI_ISL_427429 | - | SRX8149905 | SRR11582242 | SAMN14654587 | PRJNA614504 | 2020-4-7  | North America | USA | Wisconsin | Dane county      | North America | USA | Wisconsin | genome | 29782 | ? | ? | 2020-4-18 | 28.1  | -     |
| USA/WI-UW-124/2020 | EPI_ISL_427431 | - | SRX8149923 | SRR11582224 | SAMN14654589 | PRJNA614504 | 2020-4-7  | North America | USA | Wisconsin | Dane county      | North America | USA | Wisconsin | genome | 29782 | ? | ? | 2020-4-18 | 17.5  | -     |
| USA/WI-UW-127/2020 | EPI_ISL_427434 | - | SRX8149926 | SRR11582221 | SAMN14654592 | PRJNA614504 | 2020-4-7  | North America | USA | Wisconsin | Dane county      | North America | USA | Wisconsin | genome | 29782 | ? | ? | 2020-4-18 | 19.1  | -     |
| USA/WI-UW-128/2020 | EPI_ISL_427435 | - | SRX8149927 | SRR11582220 | SAMN14654593 | PRJNA614504 | 2020-4-7  | North America | USA | Wisconsin | Dane county      | North America | USA | Wisconsin | genome | 29782 | ? | ? | 2020-4-18 | 21    | -     |
| USA/WI-UW-129/2020 | EPI_ISL_427436 | - | SRX8149928 | SRR11582219 | SAMN14654594 | PRJNA614504 | 2020-4-6  | North America | USA | Wisconsin | Dane county      | North America | USA | Wisconsin | genome | 29782 | ? | ? | 2020-4-18 | 30.7  | -     |
| USA/WI-UW-135/2020 | EPI_ISL_427442 | - | SRX8149900 | SRR11582247 | SAMN14654600 | PRJNA614504 | 2020-4-9  | North America | USA | Wisconsin | Dane county      | North America | USA | Wisconsin | genome | 29782 | ? | ? | 2020-4-18 | 22.5  | -     |
| USA/WI-UW-140/2020 | EPI_ISL_427447 | - | SRX8149906 | SRR11582241 | SAMN14654605 | PRJNA614504 | 2020-4-9  | North America | USA | Wisconsin | Dane county      | North America | USA | Wisconsin | genome | 29782 | ? | ? | 2020-4-18 | 21.43 | -     |
| USA/WI-UW-144/2020 | EPI_ISL_427451 | - | SRX8149910 | SRR11582237 | SAMN14654609 | PRJNA614504 | 2020-4-6  | North America | USA | Wisconsin | Dane county      | North America | USA | Wisconsin | genome | 29782 | ? | ? | 2020-4-18 | 23.92 | 24.31 |
| USA/WI-UW-145/2020 | EPI_ISL_427452 | - | SRX8149911 | SRR11582236 | SAMN14654610 | PRJNA614504 | 2020-4-10 | North America | USA | Wisconsin | Dane county      | North America | USA | Wisconsin | genome | 29782 | ? | ? | 2020-4-18 | 27.68 | 28.81 |
| USA/WI-UW-146/2020 | EPI_ISL_427453 | - | SRX8149912 | SRR11582235 | SAMN14654611 | PRJNA614504 | 2020-4-6  | North America | USA | Wisconsin | Dane county      | North America | USA | Wisconsin | genome | 29782 | ? | ? | 2020-4-18 | 26.1  | -     |
| USA/WI-UW-147/2020 | EPI_ISL_427454 | - | SRX8149913 | SRR11582234 | SAMN14654612 | PRJNA614504 | 2020-4-10 | North America | USA | Wisconsin | Dane county      | North America | USA | Wisconsin | genome | 29782 | ? | ? | 2020-4-18 | 34.6  | -     |
| USA/WI-UW-148/2020 | EPI_ISL_427455 | - | SRX8149914 | SRR11582233 | SAMN14654613 | PRJNA614504 | 2020-4-7  | North America | USA | Wisconsin | Dane county      | North America | USA | Wisconsin | genome | 29782 | ? | ? | 2020-4-18 | 20.7  | -     |
| USA/WI-UW-150/2020 | EPI_ISL_427457 | - | SRX8149917 | SRR11582230 | SAMN14654615 | PRJNA614504 | 2020-4-13 | North America | USA | Wisconsin | Dane county      | North America | USA | Wisconsin | genome | 29782 | ? | ? | 2020-4-18 | 29.7  | -     |
| USA/WI-UW-151/2020 | EPI_ISL_427458 | - | SRX8149918 | SRR11582229 | SAMN14654616 | PRJNA614504 | 2020-4-8  | North America | USA | Wisconsin | Dane county      | North America | USA | Wisconsin | genome | 29782 | ? | ? | 2020-4-18 | 23.56 | 24.33 |
| USA/WI-UW-152/2020 | EPI_ISL_427459 | - | SRX8149919 | SRR11582228 | SAMN14654617 | PRJNA614504 | 2020-4-6  | North America | USA | Wisconsin | Dane county      | North America | USA | Wisconsin | genome | 29782 | ? | ? | 2020-4-18 | 35.7  | -     |
| USA/WI-UW-153/2020 | EPI_ISL_427460 | - | SRX8149920 | SRR11582227 | SAMN14654618 | PRJNA614504 | 2020-4-9  | North America | USA | Wisconsin | Dane county      | North America | USA | Wisconsin | genome | 29782 | ? | ? | 2020-4-18 | 15.1  | -     |
| USA/WI-UW-155/2020 | EPI_ISL_427462 | - | SRX8149922 | SRR11582225 | SAMN14654620 | PRJNA614504 | 2020-4-10 | North America | USA | Wisconsin | Dane county      | North America | USA | Wisconsin | genome | 29782 | ? | ? | 2020-4-18 | 33.3  | -     |
| USA/WI-UW-156/2020 | EPI_ISL_428252 | - | SRX8151738 | SRR11584248 | SAMN14656612 | PRJNA614504 | 2020-3-25 | North America | USA | Wisconsin | Milwaukee county | North America | USA | Wisconsin | genome | 29782 | ? | ? | 2020-4-20 | 19.15 | 17.42 |
| USA/WI-UW-157/2020 | EPI_ISL_428253 | - | SRX8151739 | SRR11584247 | SAMN14656613 | PRJNA614504 | 2020-3-15 | North America | USA | Wisconsin | Milwaukee county | North America | USA | Wisconsin | genome | 29782 | ? | ? | 2020-4-20 | 20.2  | 20.46 |
| USA/WI-UW-158/2020 | EPI_ISL_428254 | - | SRX8151750 | SRR11584236 | SAMN14656614 | PRJNA614504 | 2020-3-15 | North America | USA | Wisconsin | Milwaukee county | North America | USA | Wisconsin | genome | 29782 | ? | ? | 2020-4-20 | 23.93 | 24.33 |
| USA/WI-UW-159/2020 | EPI_ISL_428255 | - | SRX8151761 | SRR11584225 | SAMN14656615 | PRJNA614504 | 2020-3-15 | North America | USA | Wisconsin | Milwaukee county | North America | USA | Wisconsin | genome | 29782 | ? | ? | 2020-4-20 | 20.57 | 21.06 |
| USA/WI-UW-160/2020 | EPI_ISL_428256 | - | SRX8151772 | SRR11584214 | SAMN14656616 | PRJNA614504 | 2020-3-15 | North America | USA | Wisconsin | Milwaukee county | North America | USA | Wisconsin | genome | 29782 | ? | ? | 2020-4-20 | 18.6  | 19.08 |
| USA/WI-UW-161/2020 | EPI_ISL_428257 | - | SRX8151783 | SRR11584203 | SAMN14656617 | PRJNA614504 | 2020-3-29 | North America | USA | Wisconsin | Milwaukee county | North America | USA | Wisconsin | genome | 29782 | ? | ? | 2020-4-20 | 23.88 | 24.27 |

|                    |                |   |            |             |              |             |           |               |     |           |                  |               |     |           |        |       |   |   |           |       |       |
|--------------------|----------------|---|------------|-------------|--------------|-------------|-----------|---------------|-----|-----------|------------------|---------------|-----|-----------|--------|-------|---|---|-----------|-------|-------|
| USA/WI-UW-162/2020 | EPI_ISL_428258 | - | SRX8151794 | SRR11584192 | SAMN1465661  | PRJNA614504 | 2020-3-29 | North America | USA | Wisconsin | Milwaukee county | North America | USA | Wisconsin | genome | 29782 | ? | ? | 2020-4-20 | 22.07 | 23.25 |
| USA/WI-UW-165/2020 | EPI_ISL_428261 | - | SRX8151827 | SRR11584159 | SAMN14656621 | PRJNA614504 | 2020-3-17 | North America | USA | Wisconsin | Milwaukee county | North America | USA | Wisconsin | genome | 29782 | ? | ? | 2020-4-20 | 23.24 | 22.81 |
| USA/WI-UW-166/2020 | EPI_ISL_428262 | - | SRX8151740 | SRR11584246 | SAMN14656622 | PRJNA614504 | 2020-3-17 | North America | USA | Wisconsin | Milwaukee county | North America | USA | Wisconsin | genome | 29782 | ? | ? | 2020-4-20 | 26.01 | 25.41 |
| USA/WI-UW-168/2020 | EPI_ISL_428264 | - | SRX8151742 | SRR11584244 | SAMN14656624 | PRJNA614504 | 2020-3-19 | North America | USA | Wisconsin | Milwaukee county | North America | USA | Wisconsin | genome | 29782 | ? | ? | 2020-4-20 | 26.49 | 26.74 |
| USA/WI-UW-170/2020 | EPI_ISL_428266 | - | SRX8151744 | SRR11584242 | SAMN14656626 | PRJNA614504 | 2020-3-19 | North America | USA | Wisconsin | Milwaukee county | North America | USA | Wisconsin | genome | 29782 | ? | ? | 2020-4-20 | 21.13 | 21.33 |
| USA/WI-UW-171/2020 | EPI_ISL_428267 | - | SRX8151745 | SRR11584241 | SAMN14656627 | PRJNA614504 | 2020-3-19 | North America | USA | Wisconsin | Milwaukee county | North America | USA | Wisconsin | genome | 29782 | ? | ? | 2020-4-20 | 22.38 | 22.8  |
| USA/WI-UW-172/2020 | EPI_ISL_428268 | - | SRX8151746 | SRR11584240 | SAMN14656628 | PRJNA614504 | 2020-3-19 | North America | USA | Wisconsin | Milwaukee county | North America | USA | Wisconsin | genome | 29782 | ? | ? | 2020-4-20 | 21.67 | 21.8  |
| USA/WI-UW-173/2020 | EPI_ISL_428269 | - | SRX8151747 | SRR11584239 | SAMN14656629 | PRJNA614504 | 2020-3-20 | North America | USA | Wisconsin | Milwaukee county | North America | USA | Wisconsin | genome | 29782 | ? | ? | 2020-4-20 | 23.85 | 23.92 |
| USA/WI-UW-176/2020 | EPI_ISL_428272 | - | SRX8151751 | SRR11584235 | SAMN14656632 | PRJNA614504 | 2020-3-20 | North America | USA | Wisconsin | Milwaukee county | North America | USA | Wisconsin | genome | 29782 | ? | ? | 2020-4-20 | 21.51 | 21.64 |
| USA/WI-UW-177/2020 | EPI_ISL_428273 | - | SRX8151752 | SRR11584234 | SAMN14656633 | PRJNA614504 | 2020-3-20 | North America | USA | Wisconsin | Milwaukee county | North America | USA | Wisconsin | genome | 29782 | ? | ? | 2020-4-20 | 28.17 | 28.5  |
| USA/WI-UW-178/2020 | EPI_ISL_428274 | - | SRX8151753 | SRR11584233 | SAMN14656634 | PRJNA614504 | 2020-3-20 | North America | USA | Wisconsin | Milwaukee county | North America | USA | Wisconsin | genome | 29782 | ? | ? | 2020-4-20 | 24.44 | 26.65 |
| USA/WI-UW-179/2020 | EPI_ISL_428275 | - | SRX8151754 | SRR11584232 | SAMN14656635 | PRJNA614504 | 2020-3-21 | North America | USA | Wisconsin | Milwaukee county | North America | USA | Wisconsin | genome | 29782 | ? | ? | 2020-4-20 | 19.89 | 18.58 |
| USA/WI-UW-181/2020 | EPI_ISL_428277 | - | SRX8151756 | SRR11584230 | SAMN14656637 | PRJNA614504 | 2020-3-22 | North America | USA | Wisconsin | Milwaukee county | North America | USA | Wisconsin | genome | 29782 | ? | ? | 2020-4-20 | 28.41 | 29.61 |
| USA/WI-UW-182/2020 | EPI_ISL_428278 | - | SRX8151757 | SRR11584229 | SAMN14656638 | PRJNA614504 | 2020-3-22 | North America | USA | Wisconsin | Milwaukee county | North America | USA | Wisconsin | genome | 29782 | ? | ? | 2020-4-20 | 24.75 | 25.09 |
| USA/WI-UW-183/2020 | EPI_ISL_428279 | - | SRX8151758 | SRR11584228 | SAMN14656639 | PRJNA614504 | 2020-3-22 | North America | USA | Wisconsin | Milwaukee county | North America | USA | Wisconsin | genome | 29782 | ? | ? | 2020-4-20 | 25.76 | 25.88 |
| USA/WI-UW-184/2020 | EPI_ISL_428280 | - | SRX8151759 | SRR11584227 | SAMN14656640 | PRJNA614504 | 2020-3-22 | North America | USA | Wisconsin | Milwaukee county | North America | USA | Wisconsin | genome | 29782 | ? | ? | 2020-4-20 | 21.9  | 22.26 |
| USA/WI-UW-185/2020 | EPI_ISL_428281 | - | SRX8151760 | SRR11584226 | SAMN14656641 | PRJNA614504 | 2020-3-22 | North America | USA | Wisconsin | Milwaukee county | North America | USA | Wisconsin | genome | 29782 | ? | ? | 2020-4-20 | 19.97 | 20.7  |
| USA/WI-UW-186/2020 | EPI_ISL_428282 | - | SRX8151762 | SRR11584224 | SAMN14656642 | PRJNA614504 | 2020-3-23 | North America | USA | Wisconsin | Milwaukee county | North America | USA | Wisconsin | genome | 29782 | ? | ? | 2020-4-20 | 16.31 | 15.63 |
| USA/WI-UW-187/2020 | EPI_ISL_428283 | - | SRX8151763 | SRR11584223 | SAMN14656643 | PRJNA614504 | 2020-3-23 | North America | USA | Wisconsin | Milwaukee county | North America | USA | Wisconsin | genome | 29782 | ? | ? | 2020-4-20 | 22.5  | 21.62 |
| USA/WI-UW-188/2020 | EPI_ISL_428284 | - | SRX8151764 | SRR11584222 | SAMN14656644 | PRJNA614504 | 2020-3-23 | North America | USA | Wisconsin | Milwaukee county | North America | USA | Wisconsin | genome | 29782 | ? | ? | 2020-4-20 | 30.05 | 29.06 |
| USA/WI-UW-189/2020 | EPI_ISL_428285 | - | SRX8151765 | SRR11584221 | SAMN14656645 | PRJNA614504 | 2020-3-23 | North America | USA | Wisconsin | Milwaukee county | North America | USA | Wisconsin | genome | 29782 | ? | ? | 2020-4-20 | 25.05 | 24.1  |
| USA/WI-UW-190/2020 | EPI_ISL_428286 | - | SRX8151766 | SRR11584220 | SAMN14656646 | PRJNA614504 | 2020-3-23 | North America | USA | Wisconsin | Milwaukee county | North America | USA | Wisconsin | genome | 29782 | ? | ? | 2020-4-20 | 15.76 | 15.34 |
| USA/WI-UW-191/2020 | EPI_ISL_428287 | - | SRX8151767 | SRR11584219 | SAMN14656647 | PRJNA614504 | 2020-3-23 | North America | USA | Wisconsin | Milwaukee county | North America | USA | Wisconsin | genome | 29782 | ? | ? | 2020-4-20 | 15.52 | 15.23 |
| USA/WI-UW-192/2020 | EPI_ISL_428288 | - | SRX8151768 | SRR11584218 | SAMN14656648 | PRJNA614504 | 2020-3-23 | North America | USA | Wisconsin | Milwaukee county | North America | USA | Wisconsin | genome | 29782 | ? | ? | 2020-4-20 | 28.48 | 28.3  |
| USA/WI-UW-195/2020 | EPI_ISL_428291 | - | SRX8151771 | SRR11584215 | SAMN14656651 | PRJNA614504 | 2020-3-24 | North America | USA | Wisconsin | Milwaukee county | North America | USA | Wisconsin | genome | 29782 | ? | ? | 2020-4-20 | 19.21 | 18.41 |

| Study ID           | Accession      | Sex | SRX ID     | SRR ID      | SAMN ID      | PRJNA ID    | Collection Date | Country       | State | County    | City             | Region        | Country | State     | County | Genome Type | Size (Mb) | Year | Month     | Day   | Mean Coverage | Min Coverage | Max Coverage |
|--------------------|----------------|-----|------------|-------------|--------------|-------------|-----------------|---------------|-------|-----------|------------------|---------------|---------|-----------|--------|-------------|-----------|------|-----------|-------|---------------|--------------|--------------|
| USA/WI-UW-196/2020 | EPI_ISL_428292 | -   | SRX8151773 | SRR11584213 | SAMN14656652 | PRJNA614504 | 2020-3-21       | North America | USA   | Wisconsin | Milwaukee county | North America | USA     | Wisconsin | genome | 29782       | ?         | ?    | 2020-4-20 | 28.66 | 29.46         |              |              |
| USA/WI-UW-197/2020 | EPI_ISL_428293 | -   | SRX8151774 | SRR11584212 | SAMN14656653 | PRJNA614504 | 2020-3-24       | North America | USA   | Wisconsin | Milwaukee county | North America | USA     | Wisconsin | genome | 29782       | ?         | ?    | 2020-4-20 | 27.82 | 27.23         |              |              |
| USA/WI-UW-200/2020 | EPI_ISL_428296 | -   | SRX8151777 | SRR11584209 | SAMN14656656 | PRJNA614504 | 2020-3-24       | North America | USA   | Wisconsin | Milwaukee county | North America | USA     | Wisconsin | genome | 29782       | ?         | ?    | 2020-4-20 | 17.64 | 17.78         |              |              |
| USA/WI-UW-205/2020 | EPI_ISL_428301 | -   | SRX8151782 | SRR11584204 | SAMN14656661 | PRJNA614504 | 2020-3-25       | North America | USA   | Wisconsin | Milwaukee county | North America | USA     | Wisconsin | genome | 29782       | ?         | ?    | 2020-4-20 | 27.03 | 27.23         |              |              |
| USA/WI-UW-207/2020 | EPI_ISL_428303 | -   | SRX8151785 | SRR11584201 | SAMN14656663 | PRJNA614504 | 2020-3-23       | North America | USA   | Wisconsin | Milwaukee county | North America | USA     | Wisconsin | genome | 29782       | ?         | ?    | 2020-4-20 | 24.78 | 25.02         |              |              |
| USA/WI-UW-208/2020 | EPI_ISL_428304 | -   | SRX8151786 | SRR11584200 | SAMN14656664 | PRJNA614504 | 2020-3-25       | North America | USA   | Wisconsin | Milwaukee county | North America | USA     | Wisconsin | genome | 29782       | ?         | ?    | 2020-4-20 | 25.72 | 24.87         |              |              |
| USA/WI-UW-209/2020 | EPI_ISL_428305 | -   | SRX8151787 | SRR11584199 | SAMN14656665 | PRJNA614504 | 2020-3-25       | North America | USA   | Wisconsin | Milwaukee county | North America | USA     | Wisconsin | genome | 29782       | ?         | ?    | 2020-4-20 | 17.48 | 16.62         |              |              |
| USA/WI-UW-210/2020 | EPI_ISL_428306 | -   | SRX8151788 | SRR11584198 | SAMN14656666 | PRJNA614504 | 2020-3-24       | North America | USA   | Wisconsin | Milwaukee county | North America | USA     | Wisconsin | genome | 29782       | ?         | ?    | 2020-4-20 | 24.67 | 24.17         |              |              |
| USA/WI-UW-211/2020 | EPI_ISL_428307 | -   | SRX8151789 | SRR11584197 | SAMN14656667 | PRJNA614504 | 2020-3-25       | North America | USA   | Wisconsin | Milwaukee county | North America | USA     | Wisconsin | genome | 29782       | ?         | ?    | 2020-4-20 | 26.72 | 27.21         |              |              |
| USA/WI-UW-212/2020 | EPI_ISL_428308 | -   | SRX8151790 | SRR11584196 | SAMN14656668 | PRJNA614504 | 2020-3-25       | North America | USA   | Wisconsin | Milwaukee county | North America | USA     | Wisconsin | genome | 29782       | ?         | ?    | 2020-4-20 | 26.05 | 26.57         |              |              |
| USA/WI-UW-213/2020 | EPI_ISL_428309 | -   | SRX8151791 | SRR11584195 | SAMN14656669 | PRJNA614504 | 2020-3-25       | North America | USA   | Wisconsin | Milwaukee county | North America | USA     | Wisconsin | genome | 29782       | ?         | ?    | 2020-4-20 | 25.77 | 26.74         |              |              |
| USA/WI-UW-215/2020 | EPI_ISL_428311 | -   | SRX8151793 | SRR11584193 | SAMN14656671 | PRJNA614504 | 2020-3-25       | North America | USA   | Wisconsin | Milwaukee county | North America | USA     | Wisconsin | genome | 29782       | ?         | ?    | 2020-4-20 | 29.01 | 29.94         |              |              |
| USA/WI-UW-216/2020 | EPI_ISL_428312 | -   | SRX8151795 | SRR11584191 | SAMN14656672 | PRJNA614504 | 2020-3-25       | North America | USA   | Wisconsin | Milwaukee county | North America | USA     | Wisconsin | genome | 29782       | ?         | ?    | 2020-4-20 | 28.39 | 29.36         |              |              |
| USA/WI-UW-217/2020 | EPI_ISL_428313 | -   | SRX8151796 | SRR11584190 | SAMN14656673 | PRJNA614504 | 2020-3-25       | North America | USA   | Wisconsin | Milwaukee county | North America | USA     | Wisconsin | genome | 29782       | ?         | ?    | 2020-4-20 | 29.14 | 29.6          |              |              |
| USA/WI-UW-218/2020 | EPI_ISL_428314 | -   | SRX8151797 | SRR11584189 | SAMN14656674 | PRJNA614504 | 2020-3-25       | North America | USA   | Wisconsin | Milwaukee county | North America | USA     | Wisconsin | genome | 29782       | ?         | ?    | 2020-4-20 | 26.03 | 27.14         |              |              |
| USA/WI-UW-219/2020 | EPI_ISL_428315 | -   | SRX8151798 | SRR11584188 | SAMN14656675 | PRJNA614504 | 2020-3-25       | North America | USA   | Wisconsin | Milwaukee county | North America | USA     | Wisconsin | genome | 29782       | ?         | ?    | 2020-4-20 | 21.97 | 22.39         |              |              |
| USA/WI-UW-221/2020 | EPI_ISL_428317 | -   | SRX8151800 | SRR11584186 | SAMN14656677 | PRJNA614504 | 2020-3-25       | North America | USA   | Wisconsin | Milwaukee county | North America | USA     | Wisconsin | genome | 29782       | ?         | ?    | 2020-4-20 | 16.03 | 15.91         |              |              |
| USA/WI-UW-222/2020 | EPI_ISL_428318 | -   | SRX8151801 | SRR11584185 | SAMN14656678 | PRJNA614504 | 2020-3-25       | North America | USA   | Wisconsin | Milwaukee county | North America | USA     | Wisconsin | genome | 29782       | ?         | ?    | 2020-4-20 | 24.65 | 25.06         |              |              |
| USA/WI-UW-223/2020 | EPI_ISL_428319 | -   | SRX8151802 | SRR11584184 | SAMN14656679 | PRJNA614504 | 2020-3-26       | North America | USA   | Wisconsin | Milwaukee county | North America | USA     | Wisconsin | genome | 29782       | ?         | ?    | 2020-4-20 | 26.67 | 28.25         |              |              |
| USA/WI-UW-225/2020 | EPI_ISL_428321 | -   | SRX8151804 | SRR11584182 | SAMN14656681 | PRJNA614504 | 2020-3-26       | North America | USA   | Wisconsin | Milwaukee county | North America | USA     | Wisconsin | genome | 29782       | ?         | ?    | 2020-4-20 | 18.55 | 18.91         |              |              |
| USA/WI-UW-226/2020 | EPI_ISL_428322 | -   | SRX8151806 | SRR11584180 | SAMN14656682 | PRJNA614504 | 2020-3-26       | North America | USA   | Wisconsin | Milwaukee county | North America | USA     | Wisconsin | genome | 29782       | ?         | ?    | 2020-4-20 | 18.81 | 19.22         |              |              |
| USA/WI-UW-227/2020 | EPI_ISL_428323 | -   | SRX8151807 | SRR11584179 | SAMN14656683 | PRJNA614504 | 2020-3-26       | North America | USA   | Wisconsin | Milwaukee county | North America | USA     | Wisconsin | genome | 29782       | ?         | ?    | 2020-4-20 | 22.54 | 23.52         |              |              |
| USA/WI-UW-228/2020 | EPI_ISL_428324 | -   | SRX8151808 | SRR11584178 | SAMN14656684 | PRJNA614504 | 2020-3-26       | North America | USA   | Wisconsin | Milwaukee county | North America | USA     | Wisconsin | genome | 29782       | ?         | ?    | 2020-4-20 | 17.61 | 19.04         |              |              |
| USA/WI-UW-229/2020 | EPI_ISL_428325 | -   | SRX8151809 | SRR11584177 | SAMN14656685 | PRJNA614504 | 2020-3-26       | North America | USA   | Wisconsin | Milwaukee county | North America | USA     | Wisconsin | genome | 29782       | ?         | ?    | 2020-4-20 | 17.43 | 18.08         |              |              |
| USA/WI-UW-230/2020 | EPI_ISL_428326 | -   | SRX8151810 | SRR11584176 | SAMN14656686 | PRJNA614504 | 2020-3-26       | North America | USA   | Wisconsin | Milwaukee county | North America | USA     | Wisconsin | genome | 29782       | ?         | ?    | 2020-4-20 | 24.4  | 25.99         |              |              |

| Project ID         | Accession      | Year | Host       | Strain      | Genome       | Region      | Country   | State         | County | City      | Lat              | Long          | Year | Month     | Day    | Genome Size (Mb) | GC Content (%) | Assembly Quality (N50) | Reference | Year  | Month | Day | Genome Size (Mb) | GC Content (%) | Assembly Quality (N50) |
|--------------------|----------------|------|------------|-------------|--------------|-------------|-----------|---------------|--------|-----------|------------------|---------------|------|-----------|--------|------------------|----------------|------------------------|-----------|-------|-------|-----|------------------|----------------|------------------------|
| USA/WI-UW-231/2020 | EPI_ISL_428327 | -    | SRX8151811 | SRR11584175 | SAMN14656687 | PRJNA614504 | 2020-3-26 | North America | USA    | Wisconsin | Milwaukee county | North America | USA  | Wisconsin | genome | 29782            | ?              | ?                      | 2020-4-20 | 19.42 | 19.94 |     |                  |                |                        |
| USA/WI-UW-232/2020 | EPI_ISL_428328 | -    | SRX8151812 | SRR11584174 | SAMN14656688 | PRJNA614504 | 2020-3-27 | North America | USA    | Wisconsin | Milwaukee county | North America | USA  | Wisconsin | genome | 29782            | ?              | ?                      | 2020-4-20 | 19.54 | 18.33 |     |                  |                |                        |
| USA/WI-UW-233/2020 | EPI_ISL_428329 | -    | SRX8151813 | SRR11584173 | SAMN14656689 | PRJNA614504 | 2020-3-27 | North America | USA    | Wisconsin | Milwaukee county | North America | USA  | Wisconsin | genome | 29782            | ?              | ?                      | 2020-4-20 | 26.33 | 26.12 |     |                  |                |                        |
| USA/WI-UW-234/2020 | EPI_ISL_428330 | -    | SRX8151814 | SRR11584172 | SAMN14656690 | PRJNA614504 | 2020-3-26 | North America | USA    | Wisconsin | Milwaukee county | North America | USA  | Wisconsin | genome | 29782            | ?              | ?                      | 2020-4-20 | 19.88 | 18.62 |     |                  |                |                        |
| USA/WI-UW-235/2020 | EPI_ISL_428331 | -    | SRX8151815 | SRR11584171 | SAMN14656691 | PRJNA614504 | 2020-3-28 | North America | USA    | Wisconsin | Milwaukee county | North America | USA  | Wisconsin | genome | 29782            | ?              | ?                      | 2020-4-20 | 26.87 | 17.15 |     |                  |                |                        |
| USA/WI-UW-236/2020 | EPI_ISL_428332 | -    | SRX8151817 | SRR11584169 | SAMN14656692 | PRJNA614504 | 2020-3-27 | North America | USA    | Wisconsin | Milwaukee county | North America | USA  | Wisconsin | genome | 29782            | ?              | ?                      | 2020-4-20 | 23.37 | 23.27 |     |                  |                |                        |
| USA/WI-UW-237/2020 | EPI_ISL_428333 | -    | SRX8151818 | SRR11584168 | SAMN14656693 | PRJNA614504 | 2020-3-27 | North America | USA    | Wisconsin | Milwaukee county | North America | USA  | Wisconsin | genome | 29782            | ?              | ?                      | 2020-4-20 | 18.05 | 17.98 |     |                  |                |                        |
| USA/WI-UW-238/2020 | EPI_ISL_428334 | -    | SRX8151819 | SRR11584167 | SAMN14656694 | PRJNA614504 | 2020-3-27 | North America | USA    | Wisconsin | Milwaukee county | North America | USA  | Wisconsin | genome | 29782            | ?              | ?                      | 2020-4-20 | 26.38 | 25.52 |     |                  |                |                        |
| USA/WI-UW-240/2020 | EPI_ISL_428336 | -    | SRX8151821 | SRR11584165 | SAMN14656696 | PRJNA614504 | 2020-3-27 | North America | USA    | Wisconsin | Milwaukee county | North America | USA  | Wisconsin | genome | 29782            | ?              | ?                      | 2020-4-20 | 24.49 | 24.26 |     |                  |                |                        |
| USA/WI-UW-241/2020 | EPI_ISL_428337 | -    | SRX8151822 | SRR11584164 | SAMN14656697 | PRJNA614504 | 2020-3-27 | North America | USA    | Wisconsin | Milwaukee county | North America | USA  | Wisconsin | genome | 29782            | ?              | ?                      | 2020-4-20 | 17.33 | 16.59 |     |                  |                |                        |
| USA/WI-UW-242/2020 | EPI_ISL_428338 | -    | SRX8151823 | SRR11584163 | SAMN14656698 | PRJNA614504 | 2020-3-28 | North America | USA    | Wisconsin | Milwaukee county | North America | USA  | Wisconsin | genome | 29782            | ?              | ?                      | 2020-4-20 | 17.93 | 17.52 |     |                  |                |                        |
| USA/WI-UW-245/2020 | EPI_ISL_428341 | -    | SRX8151826 | SRR11584160 | SAMN14656701 | PRJNA614504 | 2020-3-28 | North America | USA    | Wisconsin | Milwaukee county | North America | USA  | Wisconsin | genome | 29782            | ?              | ?                      | 2020-4-20 | 28.3  | 28.08 |     |                  |                |                        |
| USA/WI-UW-246/2020 | EPI_ISL_428342 | -    | SRX8151828 | SRR11584158 | SAMN14656702 | PRJNA614504 | 2020-3-28 | North America | USA    | Wisconsin | Milwaukee county | North America | USA  | Wisconsin | genome | 29782            | ?              | ?                      | 2020-4-20 | 22.16 | 21.97 |     |                  |                |                        |
| USA/WI-UW-248/2020 | EPI_ISL_428344 | -    | SRX8151830 | SRR11584156 | SAMN14656704 | PRJNA614504 | 2020-3-28 | North America | USA    | Wisconsin | Milwaukee county | North America | USA  | Wisconsin | genome | 29782            | ?              | ?                      | 2020-4-20 | 25.24 | 24.96 |     |                  |                |                        |
| USA/WI-UW-259/2020 | EPI_ISL_428935 | -    | SRX8155700 | SRR11588239 | SAMN14669377 | PRJNA614504 | 2020-4-17 | North America | USA    | Wisconsin | Dane county      | North America | USA  | Wisconsin | genome | 29611            | ?              | ?                      | 2020-4-22 | 23.8  | -     |     |                  |                |                        |
| USA/WI-UW-260/2020 | EPI_ISL_428936 | -    | SRX8155701 | SRR11588238 | SAMN14669378 | PRJNA614504 | 2020-4-18 | North America | USA    | Wisconsin | Dane county      | North America | USA  | Wisconsin | genome | 29782            | ?              | ?                      | 2020-4-22 | 32.8  | -     |     |                  |                |                        |
| USA/WI-UW-270/2020 | EPI_ISL_436564 | -    | SRX8281160 | SRR11721857 | SAMN14844834 | PRJNA614504 | 2020-3-12 | North America | USA    | Wisconsin | Milwaukee county | North America | USA  | Wisconsin | genome | 29611            | ?              | ?                      | 2020-5-6  | 25.42 | 26.85 |     |                  |                |                        |
| USA/WI-UW-272/2020 | EPI_ISL_436566 | -    | SRX8281172 | SRR11721845 | SAMN14844836 | PRJNA614504 | 2020-3-27 | North America | USA    | Wisconsin | Milwaukee county | North America | USA  | Wisconsin | genome | 29782            | ?              | ?                      | 2020-5-6  | 19.54 | 18.33 |     |                  |                |                        |
| USA/WI-UW-273/2020 | EPI_ISL_436567 | -    | SRX8281183 | SRR11721834 | SAMN14844837 | PRJNA614504 | 2020-3-31 | North America | USA    | Wisconsin | Milwaukee county | North America | USA  | Wisconsin | genome | 29782            | ?              | ?                      | 2020-5-6  | 20.29 | 20.47 |     |                  |                |                        |
| USA/WI-UW-274/2020 | EPI_ISL_436568 | -    | SRX8281194 | SRR11721823 | SAMN14844838 | PRJNA614504 | 2020-3-31 | North America | USA    | Wisconsin | Milwaukee county | North America | USA  | Wisconsin | genome | 29782            | ?              | ?                      | 2020-5-6  | 25.25 | 25.5  |     |                  |                |                        |
| USA/WI-UW-275/2020 | EPI_ISL_436569 | -    | SRX8281128 | SRR11721889 | SAMN14844839 | PRJNA614504 | 2020-4-1  | North America | USA    | Wisconsin | Milwaukee county | North America | USA  | Wisconsin | genome | 29782            | ?              | ?                      | 2020-5-6  | 18.54 | 18.14 |     |                  |                |                        |
| USA/WI-UW-276/2020 | EPI_ISL_436570 | -    | SRX8281139 | SRR11721878 | SAMN14844840 | PRJNA614504 | 2020-4-1  | North America | USA    | Wisconsin | Milwaukee county | North America | USA  | Wisconsin | genome | 29782            | ?              | ?                      | 2020-5-6  | 19.27 | 19.02 |     |                  |                |                        |
| USA/WI-UW-277/2020 | EPI_ISL_436571 | -    | SRX8281150 | SRR11721867 | SAMN14844841 | PRJNA614504 | 2020-4-2  | North America | USA    | Wisconsin | Milwaukee county | North America | USA  | Wisconsin | genome | 29782            | ?              | ?                      | 2020-5-6  | 20.28 | 20.06 |     |                  |                |                        |
| USA/WI-UW-278/2020 | EPI_ISL_436572 | -    | SRX8281158 | SRR11721859 | SAMN14844842 | PRJNA614504 | 2020-4-3  | North America | USA    | Wisconsin | Milwaukee county | North America | USA  | Wisconsin | genome | 29782            | ?              | ?                      | 2020-5-6  | 16.08 | 16.12 |     |                  |                |                        |
| USA/WI-UW-279/2020 | EPI_ISL_436573 | -    | SRX8281159 | SRR11721858 | SAMN14844843 | PRJNA614504 | 2020-4-3  | North America | USA    | Wisconsin | Milwaukee county | North America | USA  | Wisconsin | genome | 29782            | ?              | ?                      | 2020-5-6  | 15.6  | 15.35 |     |                  |                |                        |



| Study ID           | Accession      | Sex      | SRX ID     | SRR ID      | SAMN ID      | PRJNA ID    | Collection Date | Region        | Country | State     | County           | Region        | Country | State     | Genome Type | Size (Mb) | GC (%) | GC (3bp) | GC (6bp) | Year     | Mean  | SD    |
|--------------------|----------------|----------|------------|-------------|--------------|-------------|-----------------|---------------|---------|-----------|------------------|---------------|---------|-----------|-------------|-----------|--------|----------|----------|----------|-------|-------|
| USA/WI-UW-324/2020 | EPI_ISL_436618 | -        | SRX8281133 | SRR11721884 | SAMN14844888 | PRJNA614504 | 2020-4-24       | North America | USA     | Wisconsin | Milwaukee county | North America | USA     | Wisconsin | genome      | 29782     | ?      | ?        | ?        | 2020-5-6 | 22.5  | 22.82 |
| USA/WI-UW-325/2020 | EPI_ISL_436619 | -        | SRX8281134 | SRR11721883 | SAMN14844889 | PRJNA614504 | 2020-4-24       | North America | USA     | Wisconsin | Milwaukee county | North America | USA     | Wisconsin | genome      | 29782     | ?      | ?        | ?        | 2020-5-6 | 25.06 | 25.75 |
| USA/WI-UW-328/2020 | EPI_ISL_436622 | -        | SRX8281137 | SRR11721880 | SAMN14844892 | PRJNA614504 | 2020-4-26       | North America | USA     | Wisconsin | Milwaukee county | North America | USA     | Wisconsin | genome      | 29782     | ?      | ?        | ?        | 2020-5-6 | 23.92 | 24.55 |
| USA/WI-UW-329/2020 | EPI_ISL_436623 | -        | SRX8281138 | SRR11721879 | SAMN14844893 | PRJNA614504 | 2020-4-25       | North America | USA     | Wisconsin | Milwaukee county | North America | USA     | Wisconsin | genome      | 29782     | ?      | ?        | ?        | 2020-5-6 | 19.32 | 18.26 |
| USA/WI-UW-330/2020 | EPI_ISL_436624 | -        | SRX8281140 | SRR11721877 | SAMN14844894 | PRJNA614504 | 2020-4-26       | North America | USA     | Wisconsin | Milwaukee county | North America | USA     | Wisconsin | genome      | 29611     | ?      | ?        | ?        | 2020-5-6 | 27.34 | 27.27 |
| USA/WI-UW-331/2020 | EPI_ISL_436625 | -        | SRX8281141 | SRR11721876 | SAMN14844895 | PRJNA614504 | 2020-4-26       | North America | USA     | Wisconsin | Milwaukee county | North America | USA     | Wisconsin | genome      | 29782     | ?      | ?        | ?        | 2020-5-6 | 29.14 | 29.12 |
| USA/WI-UW-332/2020 | EPI_ISL_436626 | -        | SRX8281142 | SRR11721875 | SAMN14844896 | PRJNA614504 | 2020-4-26       | North America | USA     | Wisconsin | Milwaukee county | North America | USA     | Wisconsin | genome      | 29782     | ?      | ?        | ?        | 2020-5-6 | 15.15 | 15.39 |
| USA/WI-UW-333/2020 | EPI_ISL_436627 | -        | SRX8281143 | SRR11721874 | SAMN14844897 | PRJNA614504 | 2020-3-24       | North America | USA     | Wisconsin | Milwaukee county | North America | USA     | Wisconsin | genome      | 29782     | ?      | ?        | ?        | 2020-5-6 | 27.45 | 26.54 |
| USA/WI-UW-334/2020 | EPI_ISL_436628 | -        | SRX8281144 | SRR11721873 | SAMN14844898 | PRJNA614504 | 2020-3-24       | North America | USA     | Wisconsin | Milwaukee county | North America | USA     | Wisconsin | genome      | 29782     | ?      | ?        | ?        | 2020-5-6 | 23.24 | 22.79 |
| USA/WI-UW-335/2020 | EPI_ISL_436629 | -        | SRX8281145 | SRR11721872 | SAMN14844899 | PRJNA614504 | 2020-3-24       | North America | USA     | Wisconsin | Milwaukee county | North America | USA     | Wisconsin | genome      | 29782     | ?      | ?        | ?        | 2020-5-6 | 30.14 | 30.69 |
| USA/WI-UW-336/2020 | EPI_ISL_436630 | -        | SRX8281146 | SRR11721871 | SAMN14844900 | PRJNA614504 | 2020-3-25       | North America | USA     | Wisconsin | Milwaukee county | North America | USA     | Wisconsin | genome      | 29782     | ?      | ?        | ?        | 2020-5-6 | 19.15 | 17.42 |
| USA/WI-UW-337/2020 | EPI_ISL_436631 | -        | SRX8281147 | SRR11721870 | SAMN14844901 | PRJNA614504 | 2020-3-26       | North America | USA     | Wisconsin | Milwaukee county | North America | USA     | Wisconsin | genome      | 29782     | ?      | ?        | ?        | 2020-5-6 | 26.46 | 26.5  |
| USA/WI-UW-338/2020 | EPI_ISL_436632 | -        | SRX8281148 | SRR11721869 | SAMN14844902 | PRJNA614504 | 2020-3-26       | North America | USA     | Wisconsin | Milwaukee county | North America | USA     | Wisconsin | genome      | 29782     | ?      | ?        | ?        | 2020-5-6 | 27.72 | 27.6  |
| USA/WI-UW-339/2020 | EPI_ISL_436633 | -        | SRX8281149 | SRR11721868 | SAMN14844903 | PRJNA614504 | 2020-3-31       | North America | USA     | Wisconsin | Milwaukee county | North America | USA     | Wisconsin | genome      | 29611     | ?      | ?        | ?        | 2020-5-6 | 33.1  | 32.57 |
| USA/WI-UW-340/2020 | EPI_ISL_436634 | -        | SRX8281151 | SRR11721866 | SAMN14844904 | PRJNA614504 | 2020-4-1        | North America | USA     | Wisconsin | Milwaukee county | North America | USA     | Wisconsin | genome      | 29782     | ?      | ?        | ?        | 2020-5-6 | 35.15 | 33.47 |
| USA/WI-UW-341/2020 | EPI_ISL_436635 | -        | SRX8281152 | SRR11721865 | SAMN14844905 | PRJNA614504 | 2020-4-2        | North America | USA     | Wisconsin | Milwaukee county | North America | USA     | Wisconsin | genome      | 29782     | ?      | ?        | ?        | 2020-5-6 | 23.18 | 22.53 |
| USA/WI-UW-342/2020 | EPI_ISL_436636 | -        | SRX8281153 | SRR11721864 | SAMN14844906 | PRJNA614504 | 2020-4-4        | North America | USA     | Wisconsin | Milwaukee county | North America | USA     | Wisconsin | genome      | 29782     | ?      | ?        | ?        | 2020-5-6 | 39.56 | 33.93 |
| USA/WI-UW-343/2020 | EPI_ISL_436637 | -        | SRX8281154 | SRR11721863 | SAMN14844907 | PRJNA614504 | 2020-4-5        | North America | USA     | Wisconsin | Milwaukee county | North America | USA     | Wisconsin | genome      | 29782     | ?      | ?        | ?        | 2020-5-6 | 27.1  | 27.73 |
| USA/WI-UW-344/2020 | EPI_ISL_436638 | -        | SRX8281155 | SRR11721862 | SAMN14844908 | PRJNA614504 | 2020-4-6        | North America | USA     | Wisconsin | Milwaukee county | North America | USA     | Wisconsin | genome      | 29782     | ?      | ?        | ?        | 2020-5-6 | 38.04 | 37.08 |
| USA/WI-UW-345/2020 | EPI_ISL_436639 | -        | SRX8281156 | SRR11721861 | SAMN14844909 | PRJNA614504 | 2020-4-9        | North America | USA     | Wisconsin | Milwaukee county | North America | USA     | Wisconsin | genome      | 29611     | ?      | ?        | ?        | 2020-5-6 | 32    | 31.81 |
| USA/WI-UW-346/2020 | EPI_ISL_436640 | -        | SRX8281157 | SRR11721860 | SAMN14844910 | PRJNA614504 | 2020-4-21       | North America | USA     | Wisconsin | Milwaukee county | North America | USA     | Wisconsin | genome      | 29782     | ?      | ?        | ?        | 2020-5-6 | 27.37 | 27.39 |
| USA/WI-UW-347/2020 | EPI_ISL_450701 | MT506886 | SRX8379446 | SRR11828929 | SAMN14995484 | PRJNA614504 | 2020-4-18       | North America | USA     | Wisconsin | Dane county      | North America | USA     | Wisconsin | genome      | 29782     | ?      | ?        | ?        | 2020-5-8 | 14    | -     |
| USA/WI-UW-351/2020 | EPI_ISL_450705 | MT506890 | SRX8379463 | SRR11828912 | SAMN14995488 | PRJNA614504 | 2020-4-14       | North America | USA     | Wisconsin | Dane county      | North America | USA     | Wisconsin | genome      | 29782     | ?      | ?        | ?        | 2020-5-8 | 25.51 | 26.64 |
| USA/WI-UW-356/2020 | EPI_ISL_450710 | MT506895 | SRX8379447 | SRR11828928 | SAMN14995493 | PRJNA614504 | 2020-4-14       | North America | USA     | Wisconsin | Dane county      | North America | USA     | Wisconsin | genome      | 29782     | ?      | ?        | ?        | 2020-5-8 | 25.55 | 26.57 |
| USA/WI-UW-359/2020 | EPI_ISL_450713 | MT506898 | SRX8379450 | SRR11828925 | SAMN14995496 | PRJNA614504 | 2020-4-18       | North America | USA     | Wisconsin | Dane county      | North America | USA     | Wisconsin | genome      | 29782     | ?      | ?        | ?        | 2020-5-8 | 17.2  | -     |



|                            |                    |              |                |                 |                  |                 |           |                  |     |           |                |                  |     |           |        |       |   |   |          |      |   |
|----------------------------|--------------------|--------------|----------------|-----------------|------------------|-----------------|-----------|------------------|-----|-----------|----------------|------------------|-----|-----------|--------|-------|---|---|----------|------|---|
| USA/WI-<br>UW-362/2<br>020 | EPI_ISL_4<br>50716 | MT50690<br>1 | SRX83794<br>53 | SRR11828<br>922 | SAMN149<br>95499 | PRJNA614<br>504 | 2020-4-17 | North<br>America | USA | Wisconsin | Dane<br>county | North<br>America | USA | Wisconsin | genome | 29782 | ? | ? | 2020-5-8 | 35.7 | - |
|----------------------------|--------------------|--------------|----------------|-----------------|------------------|-----------------|-----------|------------------|-----|-----------|----------------|------------------|-----|-----------|--------|-------|---|---|----------|------|---|

**Supplementary Table 3.** GISAID accession numbers and associated information for all consensus sequences included in this manuscript.

| name                       | pool        | sequence                         | length | %gc   | tm (use 65) |
|----------------------------|-------------|----------------------------------|--------|-------|-------------|
| nCoV-2019_1_LEFT           | nCoV-2019_1 | ACCAACCAACTTTTCG<br>ATCTCTTGT    | 24     | 41.67 | 60.69       |
| nCoV-2019_1_RIGHT          | nCoV-2019_1 | CATCTTTAAGATGTTG<br>ACGTGCCTC    | 25     | 44    | 60.45       |
| nCoV-2019_2_LEFT           | nCoV-2019_2 | CTGTTTTACAGGTTTC<br>GCGACGT      | 22     | 50    | 61.67       |
| nCoV-2019_2_RIGHT          | nCoV-2019_2 | TAAGGATCAGTGCCA<br>AGCTCGT       | 22     | 50    | 61.74       |
| nCoV-2019_3_LEFT           | nCoV-2019_1 | CGGTAATAAAGGAGC<br>TGGTGGC       | 22     | 54.55 | 61.32       |
| nCoV-2019_3_RIGHT          | nCoV-2019_1 | AAGGTGTCTGCAATT<br>CATAGCTCT     | 24     | 41.67 | 60.32       |
| nCoV-2019_4_LEFT           | nCoV-2019_2 | GGTGTATACTGCTGCC<br>GTGAAC       | 22     | 54.55 | 61.56       |
| nCoV-2019_4_RIGHT          | nCoV-2019_2 | CACAAGTAGTGGCAC<br>CTTCTTTAGT    | 25     | 44    | 60.97       |
| nCoV-2019_5_LEFT           | nCoV-2019_1 | TGGTGAAACTTCATG<br>GCAGACG       | 22     | 50    | 61.39       |
| nCoV-2019_5_RIGHT          | nCoV-2019_1 | ATTGATGTTGACTTTC<br>TCTTTTTGGAGT | 28     | 32.14 | 60.17       |
| nCoV-2019_6_LEFT           | nCoV-2019_2 | GGTGTGTTGGAGAA<br>GGTCCG         | 22     | 54.55 | 61.64       |
| nCoV-2019_6_RIGHT          | nCoV-2019_2 | TAGCGGCCTTCTGTA<br>AAACACG       | 22     | 50    | 61.18       |
| nCoV-2019_7_LEFT           | nCoV-2019_1 | ATCAGAGGCTGCTCG<br>TGTTGTA       | 22     | 50    | 61.73       |
| nCoV-2019_7_LEFT_<br>alt0  | nCoV-2019_1 | CATTTGCATCAGAGG<br>CTGCTCG       | 22     | 54.55 | 62.44       |
| nCoV-2019_7_RIGHT          | nCoV-2019_1 | TGCACAGGTGACAAT<br>TTGTCCA       | 22     | 45.45 | 60.95       |
| nCoV-2019_7_RIGHT_<br>alt5 | nCoV-2019_1 | AGGTGACAATTTGTC<br>CACCGAC       | 22     | 50    | 61.07       |
| nCoV-2019_8_LEFT           | nCoV-2019_2 | AGAGTTTCTTAGAGA<br>CGGTTGGGA     | 24     | 45.83 | 61          |
| nCoV-2019_8_RIGHT          | nCoV-2019_2 | GCTTCAACAGCTTCA<br>CTAGTAGGT     | 24     | 45.83 | 60.56       |
| nCoV-2019_9_LEFT           | nCoV-2019_1 | TCCCACAGAAGTGTT<br>AACAGAGGA     | 24     | 45.83 | 61.18       |
| nCoV-2019_9_LEFT_<br>alt4  | nCoV-2019_1 | TTCCCACAGAAGTGT<br>TAACAGAGG     | 24     | 45.83 | 60.44       |
| nCoV-2019_9_RIGHT          | nCoV-2019_1 | ATGACAGCATCTGCC<br>ACAACAC       | 22     | 50    | 61.71       |
| nCoV-2019_9_RIGHT_<br>alt2 | nCoV-2019_1 | GACAGCATCTGCCAC<br>AACACAG       | 22     | 54.55 | 62.26       |
| nCoV-2019_10_LEFT          | nCoV-2019_2 | TGAGAAGTGCTCTGC<br>CTATACAGT     | 24     | 45.83 | 61.12       |
| nCoV-2019_10_RIGH<br>T     | nCoV-2019_2 | TCATCTAACCAATCTT<br>CTTCTTGCTCT  | 27     | 37.04 | 60.31       |
| nCoV-2019_11_LEFT          | nCoV-2019_1 | GGAATTTGGTGCCAC<br>TTCTGCT       | 22     | 50    | 61.66       |
| nCoV-2019_11_RIGH<br>T     | nCoV-2019_1 | TCATCAGATTCAACTT<br>GCATGGCA     | 24     | 41.67 | 61.35       |
| nCoV-2019_12_LEFT          | nCoV-2019_2 | AAACATGGAGGAGG<br>TGTTGCAG       | 22     | 50    | 61.08       |

|                             |             |                                    |    |       |       |
|-----------------------------|-------------|------------------------------------|----|-------|-------|
| nCoV-2019_12_RIGH<br>T      | nCoV-2019_2 | TTCACTCTTCATTTCC<br>AAAAAGCTTGA    | 27 | 33.33 | 60.36 |
| nCoV-2019_13_LEFT           | nCoV-2019_1 | TCGCACAAATGTCTAC<br>TTAGCTGT       | 24 | 41.67 | 60.56 |
| nCoV-2019_13_RIGH<br>T      | nCoV-2019_1 | ACCACAGCAGTTAAA<br>ACACCCT         | 22 | 45.45 | 60.36 |
| nCoV-2019_14_LEFT           | nCoV-2019_2 | CATCCAGATTCTGCCA<br>CTCTTGT        | 23 | 47.83 | 60.62 |
| nCoV-2019_14_LEFT<br>_alt4  | nCoV-2019_2 | TGGCAATCTTCATCCA<br>GATTCTGC       | 24 | 45.83 | 61.47 |
| nCoV-2019_14_RIGH<br>T      | nCoV-2019_2 | AGTTTCCACACAGAC<br>AGGCATT         | 22 | 45.45 | 60.42 |
| nCoV-2019_14_RIGH<br>T_alt2 | nCoV-2019_2 | TGCGTGTCTTCTCTGC<br>ATGTGC         | 22 | 50    | 62.76 |
| nCoV-2019_15_LEFT           | nCoV-2019_1 | ACAGTGCTTAAAAAG<br>TGAAAAAGTGCC    | 27 | 37.04 | 61.32 |
| nCoV-2019_15_LEFT<br>_alt1  | nCoV-2019_1 | AGTGCTTAAAAAGTG<br>TAAAAGTGCTT     | 26 | 34.62 | 60.13 |
| nCoV-2019_15_RIGH<br>T      | nCoV-2019_1 | AACAGAAACTGTAGC<br>TGGCACT         | 22 | 45.45 | 60.16 |
| nCoV-2019_15_RIGH<br>T_alt3 | nCoV-2019_1 | ACTGTAGCTGGCACT<br>TTGAGAGA        | 23 | 47.83 | 61.57 |
| nCoV-2019_16_LEFT           | nCoV-2019_2 | AATTTGGAAGAAGCT<br>GCTCGGT         | 22 | 45.45 | 60.82 |
| nCoV-2019_16_RIGH<br>T      | nCoV-2019_2 | CACAACCTGCGTGTG<br>GAGGTTA         | 22 | 50    | 61.32 |
| nCoV-2019_17_LEFT           | nCoV-2019_1 | CTTCTTTCTTTGAGAG<br>AAGTGAGGACT    | 27 | 40.74 | 60.69 |
| nCoV-2019_17_RIGH<br>T      | nCoV-2019_1 | TTTGTGGAGTGTTA<br>ACAATGCAGT       | 25 | 36    | 60.11 |
| nCoV-2019_18_LEFT           | nCoV-2019_2 | TGGAAATACCCACAA<br>GTTAATGGTTTAAC  | 29 | 34.48 | 60.69 |
| nCoV-2019_18_LEFT<br>_alt2  | nCoV-2019_2 | ACTTCTATTAATGGG<br>CAGATAACAACCTGT | 30 | 33.33 | 61.38 |
| nCoV-2019_18_RIGH<br>T      | nCoV-2019_2 | AGCTTGTTTACCACA<br>CGTACAAGG       | 24 | 45.83 | 61.51 |
| nCoV-2019_18_RIGH<br>T_alt1 | nCoV-2019_2 | GCTTGTTTACCACAC<br>GTACAAGG        | 23 | 47.83 | 60.3  |
| nCoV-2019_19_LEFT           | nCoV-2019_1 | GCTGTTATGTACATGG<br>GCACACT        | 23 | 47.83 | 61.18 |
| nCoV-2019_19_RIGH<br>T      | nCoV-2019_1 | TGTCCAACCTAGGGT<br>CAATTTCTGT      | 25 | 40    | 60.4  |
| nCoV-2019_20_LEFT           | nCoV-2019_2 | ACAAAGAAAAACAGTT<br>ACACAACAACCA   | 27 | 33.33 | 60.68 |
| nCoV-2019_20_RIGH<br>T      | nCoV-2019_2 | ACGTGGCTTTATTAGT<br>TGCATTGTT      | 25 | 36    | 60.28 |
| nCoV-2019_21_LEFT           | nCoV-2019_1 | TGGCTATTGATTATAA<br>ACACTACACACCC  | 29 | 37.93 | 61.49 |
| nCoV-2019_21_LEFT<br>_alt2  | nCoV-2019_1 | GGCTATTGATTATAAA<br>CACTACACACCCCT | 29 | 37.93 | 61.29 |
| nCoV-2019_21_RIGH<br>T      | nCoV-2019_1 | TAGATCTGTGTGGCC<br>AACCTCT         | 22 | 50    | 60.83 |
| nCoV-2019_21_RIGH<br>T_alt0 | nCoV-2019_1 | GATCTGTGTGGCCAA<br>CCTCTTC         | 22 | 54.55 | 61.2  |
| nCoV-2019_22_LEFT           | nCoV-2019_2 | ACTACCGAAGTTGTA<br>GGAGACATTATACT  | 29 | 37.93 | 61.25 |

|                        |             |                                   |    |       |       |
|------------------------|-------------|-----------------------------------|----|-------|-------|
| nCoV-2019_22_RIGH<br>T | nCoV-2019_2 | ACAGTATTCTTTGCTA<br>TAGTAGTCGGC   | 27 | 40.74 | 60.73 |
| nCoV-2019_23_LEFT      | nCoV-2019_1 | ACAACACTAACATAG<br>TTACACGGTGT    | 27 | 37.04 | 60.26 |
| nCoV-2019_23_RIGH<br>T | nCoV-2019_1 | ACCAGTACAGTAGGT<br>TGCAATAGTG     | 25 | 44    | 60.57 |
| nCoV-2019_24_LEFT      | nCoV-2019_2 | AGGCATGCCTTCTTAC<br>TGTA CTG      | 23 | 47.83 | 60.37 |
| nCoV-2019_24_RIGH<br>T | nCoV-2019_2 | ACATTCTAACCATAGC<br>TGAAATCGGG    | 26 | 42.31 | 61.19 |
| nCoV-2019_25_LEFT      | nCoV-2019_1 | GCAATTGTTTTTCAG<br>CTATTTTGCACT   | 27 | 33.33 | 60.73 |
| nCoV-2019_25_RIGH<br>T | nCoV-2019_1 | ACTGTAGTGACAAGT<br>CTCTCGCA       | 23 | 47.83 | 61.3  |
| nCoV-2019_26_LEFT      | nCoV-2019_2 | TTGTGATACATTCTGT<br>GCTGGTAGT     | 25 | 40    | 60.28 |
| nCoV-2019_26_RIGH<br>T | nCoV-2019_2 | TCCGCACTATCACCAA<br>CATCAG        | 22 | 50    | 60.42 |
| nCoV-2019_27_LEFT      | nCoV-2019_1 | ACTACAGTCAGCTTAT<br>GTGTCAACC     | 25 | 44    | 60.8  |
| nCoV-2019_27_RIGH<br>T | nCoV-2019_1 | AATACAAGCACCAAG<br>GTCACGG        | 22 | 50    | 61.13 |
| nCoV-2019_28_LEFT      | nCoV-2019_2 | ACATAGAAGTTACTG<br>GCGATAGTTGT    | 26 | 38.46 | 60.13 |
| nCoV-2019_28_RIGH<br>T | nCoV-2019_2 | TGTTTAGACATGACAT<br>GAACAGGTGT    | 26 | 38.46 | 60.91 |
| nCoV-2019_29_LEFT      | nCoV-2019_1 | ACTGTGTTCCTTTTT<br>GTTGCTGC       | 24 | 41.67 | 61.39 |
| nCoV-2019_29_RIGH<br>T | nCoV-2019_1 | AGTGTACTCTATAAGT<br>TTTGATGGTGTGT | 29 | 34.48 | 60.69 |
| nCoV-2019_30_LEFT      | nCoV-2019_2 | GCACAAC TAATGGTG<br>ACTTTTTGCA    | 25 | 40    | 61.19 |
| nCoV-2019_30_RIGH<br>T | nCoV-2019_2 | ACCACTAGTAGATACA<br>CAAACACCAG    | 26 | 42.31 | 60.3  |
| nCoV-2019_31_LEFT      | nCoV-2019_1 | TTCTGAGTACTGTAG<br>GCACGGC        | 22 | 54.55 | 62.03 |
| nCoV-2019_31_RIGH<br>T | nCoV-2019_1 | ACAGAATAAACACCA<br>GGTAAGAATGAGT  | 28 | 35.71 | 60.69 |
| nCoV-2019_32_LEFT      | nCoV-2019_2 | TGGTGAATACAGTCAT<br>GTAGTTGCC     | 25 | 44    | 61.09 |
| nCoV-2019_32_RIGH<br>T | nCoV-2019_2 | AGCACATCACTACGC<br>AACTTTAGA      | 24 | 41.67 | 60.56 |
| nCoV-2019_33_LEFT      | nCoV-2019_1 | ACTTTTGAAGAAGCT<br>GCGCTGT        | 22 | 45.45 | 61.58 |
| nCoV-2019_33_RIGH<br>T | nCoV-2019_1 | TGGACAGTAAACTAC<br>GTCATCAAGC     | 25 | 44    | 61.08 |
| nCoV-2019_34_LEFT      | nCoV-2019_2 | TCCCATCTGGTAAAGT<br>TGAGGGT       | 23 | 47.83 | 61.02 |
| nCoV-2019_34_RIGH<br>T | nCoV-2019_2 | AGTGAAATTGGGCCT<br>CATAGCA        | 22 | 45.45 | 60.03 |
| nCoV-2019_35_LEFT      | nCoV-2019_1 | TGTTTCGCATTCAACCA<br>GGACAG       | 22 | 50    | 61.39 |
| nCoV-2019_35_RIGH<br>T | nCoV-2019_1 | ACTTCATAGCCACAA<br>GGTTAAAGTCA    | 26 | 38.46 | 60.69 |
| nCoV-2019_36_LEFT      | nCoV-2019_2 | TTAGCTTGGTTGTAC<br>GCTGCTG        | 22 | 50    | 61.44 |

|                         |             |                                    |    |       |       |
|-------------------------|-------------|------------------------------------|----|-------|-------|
| nCoV-2019_36_RIGHT      | nCoV-2019_2 | GAACAAAGACCATTG<br>AGTACTCTGGA     | 26 | 42.31 | 60.74 |
| nCoV-2019_37_LEFT       | nCoV-2019_1 | ACACACCACTGGTTG<br>TTACTCAC        | 23 | 47.83 | 60.93 |
| nCoV-2019_37_RIGHT      | nCoV-2019_1 | GTCCACACTCTCCTAG<br>CACCAT         | 22 | 54.55 | 61.48 |
| nCoV-2019_38_LEFT       | nCoV-2019_2 | ACTGTGTTATGTATGC<br>ATCAGCTGT      | 25 | 40    | 60.86 |
| nCoV-2019_38_RIGHT      | nCoV-2019_2 | CACCAAGAGTCAGTC<br>TAAAGTAGCG      | 25 | 48    | 61.13 |
| nCoV-2019_39_LEFT       | nCoV-2019_1 | AGTATTGCCCTATTTT<br>CTTCATAACTGGT  | 29 | 34.48 | 61    |
| nCoV-2019_39_RIGHT      | nCoV-2019_1 | TGTAAGTGGACACAT<br>TGAGCCC         | 22 | 50    | 60.55 |
| nCoV-2019_40_LEFT       | nCoV-2019_2 | TGCACATCAGTAGTCT<br>TACTCTCAGT     | 26 | 42.31 | 61.25 |
| nCoV-2019_40_RIGHT      | nCoV-2019_2 | CATGGCTGCATCACG<br>GTCAAAT         | 22 | 50    | 62.09 |
| nCoV-2019_41_LEFT       | nCoV-2019_1 | GTTCCCTTCCATCATA<br>TGCAGCT        | 23 | 47.83 | 60.75 |
| nCoV-2019_41_RIGHT      | nCoV-2019_1 | TGGTATGACAACCATT<br>AGTTTGCT       | 25 | 40    | 60.75 |
| nCoV-2019_42_LEFT       | nCoV-2019_2 | TGCAAGAGATGGTTG<br>TGTCCC          | 22 | 50    | 61.08 |
| nCoV-2019_42_RIGHT      | nCoV-2019_2 | CCTACCTCCCTTTGTT<br>GTGTTGT        | 23 | 47.83 | 60.69 |
| nCoV-2019_43_LEFT       | nCoV-2019_1 | TACGACAGATGTCTT<br>GTGCTGC         | 22 | 50    | 60.93 |
| nCoV-2019_43_RIGHT      | nCoV-2019_1 | AGCAGCATCTACAGC<br>AAAAGCA         | 22 | 45.45 | 61.14 |
| nCoV-2019_44_LEFT       | nCoV-2019_2 | TGCCACAGTACGTCT<br>ACAAGCT         | 22 | 50    | 61.66 |
| nCoV-2019_44_LEFT_alt3  | nCoV-2019_2 | CCACAGTACGTCTAC<br>AAGCTGG         | 22 | 54.55 | 60.67 |
| nCoV-2019_44_RIGHT      | nCoV-2019_2 | AACCTTTCCACATACC<br>GCAGAC         | 22 | 50    | 60.87 |
| nCoV-2019_44_RIGHT_alt0 | nCoV-2019_2 | CGCAGACGGTACAGA<br>CTGTGTT         | 22 | 54.55 | 62.77 |
| nCoV-2019_45_LEFT       | nCoV-2019_1 | TACCTACAACCTGTGC<br>TAATGACCC      | 25 | 44    | 60.57 |
| nCoV-2019_45_LEFT_alt2  | nCoV-2019_1 | AGTATGTACAAATACC<br>TACAACCTTGCT   | 29 | 34.48 | 60.94 |
| nCoV-2019_45_RIGHT      | nCoV-2019_1 | AAATTGTTTCTTCATG<br>TTGGTAGTTAGAGA | 30 | 30    | 60.01 |
| nCoV-2019_45_RIGHT_alt7 | nCoV-2019_1 | TTCATGTTGGTAGTTA<br>GAGAAAGTGTGTC  | 29 | 37.93 | 61.53 |
| nCoV-2019_46_LEFT       | nCoV-2019_2 | TGTCGCTTCCAAGAA<br>AAGGACG         | 22 | 50    | 61.38 |
| nCoV-2019_46_LEFT_alt1  | nCoV-2019_2 | CGCTTCCAAGAAAAG<br>GACGAAGA        | 23 | 47.83 | 61.35 |
| nCoV-2019_46_RIGHT      | nCoV-2019_2 | CACGTTACCTAAGTT<br>GGCGTA          | 22 | 50    | 60.86 |
| nCoV-2019_46_RIGHT_alt2 | nCoV-2019_2 | CACGTTACCTAAGTT<br>GGCGTAT         | 23 | 47.83 | 61.17 |
| nCoV-2019_47_LEFT       | nCoV-2019_1 | AGGACTGGTATGATT<br>TTGTAGAAAACCC   | 28 | 39.29 | 61.42 |

|                        |             |                                    |    |       |       |
|------------------------|-------------|------------------------------------|----|-------|-------|
| nCoV-2019_47_RIGH<br>T | nCoV-2019_1 | AATAACGGTCAAAGA<br>GTTTTAACCTCTC   | 28 | 35.71 | 60.06 |
| nCoV-2019_48_LEFT      | nCoV-2019_2 | TGTTGACACTGACTT<br>AACAAAGCCT      | 25 | 40    | 61.09 |
| nCoV-2019_48_RIGH<br>T | nCoV-2019_2 | TAGATTACCAGAAGC<br>AGCGTGC         | 22 | 50    | 60.74 |
| nCoV-2019_49_LEFT      | nCoV-2019_1 | AGGAATTACTTGTGTA<br>TGCTGCTGA      | 25 | 40    | 60.57 |
| nCoV-2019_49_RIGH<br>T | nCoV-2019_1 | TGACGATGACTTGGT<br>TAGCATTAAATACA  | 28 | 35.71 | 61.05 |
| nCoV-2019_50_LEFT      | nCoV-2019_2 | GTTGATAAGTACTTTG<br>ATTGTTACGATGGT | 30 | 33.33 | 60.59 |
| nCoV-2019_50_RIGH<br>T | nCoV-2019_2 | TAACATGTTGTGCCA<br>ACCACCA         | 22 | 45.45 | 60.95 |
| nCoV-2019_51_LEFT      | nCoV-2019_1 | TCAATAGCCGCCACTA<br>GAGGAG         | 22 | 54.55 | 61.34 |
| nCoV-2019_51_RIGH<br>T | nCoV-2019_1 | AGTGCATTAACATTG<br>GCCGTGA         | 22 | 45.45 | 61.14 |
| nCoV-2019_52_LEFT      | nCoV-2019_2 | CATCAGGAGATGCCA<br>CAACTGC         | 22 | 54.55 | 61.83 |
| nCoV-2019_52_RIGH<br>T | nCoV-2019_2 | GTTGAGAGCAAAATT<br>CATGAGGTCC      | 25 | 44    | 60.62 |
| nCoV-2019_53_LEFT      | nCoV-2019_1 | AGCAAAATGTTGGAC<br>TGAGACTGA       | 24 | 41.67 | 60.69 |
| nCoV-2019_53_RIGH<br>T | nCoV-2019_1 | AGCCTCATAAACTC<br>AGGTTCCC         | 23 | 47.83 | 60.31 |
| nCoV-2019_54_LEFT      | nCoV-2019_2 | TGAGTTAACAGGACA<br>CATGTTAGACA     | 26 | 38.46 | 60.18 |
| nCoV-2019_54_RIGH<br>T | nCoV-2019_2 | AACCAAAAATTGTC<br>CATTAGCACA       | 25 | 36    | 60.11 |
| nCoV-2019_55_LEFT      | nCoV-2019_1 | ACTCAACTTTACTTAG<br>GAGGTATGAGCT   | 28 | 39.29 | 61.43 |
| nCoV-2019_55_RIGH<br>T | nCoV-2019_1 | GGTGTACTCTCCTATT<br>TGTACTTTACTGT  | 29 | 37.93 | 60.54 |
| nCoV-2019_56_LEFT      | nCoV-2019_2 | ACCTAGACCACCACTT<br>AACCGA         | 22 | 50    | 60.49 |
| nCoV-2019_56_RIGH<br>T | nCoV-2019_2 | ACACTATGCGAGCAG<br>AAGGGTA         | 22 | 50    | 61.21 |
| nCoV-2019_57_LEFT      | nCoV-2019_1 | ATTCTACACTCCAGG<br>GACCACC         | 22 | 54.55 | 61.16 |
| nCoV-2019_57_RIGH<br>T | nCoV-2019_1 | GTAATTGAGCAGGGT<br>CGCCAAT         | 22 | 50    | 61.26 |
| nCoV-2019_58_LEFT      | nCoV-2019_2 | TGATTTGAGTGTTGTC<br>AATGCCAGA      | 25 | 40    | 61.44 |
| nCoV-2019_58_RIGH<br>T | nCoV-2019_2 | CTTTTCTCCAAGCAG<br>GGTTACGT        | 23 | 47.83 | 61.06 |
| nCoV-2019_59_LEFT      | nCoV-2019_1 | TCACGCATGATGTTTC<br>ATCTGCA        | 23 | 43.48 | 61.42 |
| nCoV-2019_59_RIGH<br>T | nCoV-2019_1 | AAGAGTCCTGTTACA<br>TTTTCAGCTTG     | 26 | 38.46 | 60.02 |
| nCoV-2019_60_LEFT      | nCoV-2019_2 | TGATAGAGACCTTTAT<br>GACAAGTTGCA    | 27 | 37.04 | 60.53 |
| nCoV-2019_60_RIGH<br>T | nCoV-2019_2 | GGTACCAACAGCTTC<br>TCTAGTAGC       | 24 | 50    | 60.44 |
| nCoV-2019_61_LEFT      | nCoV-2019_1 | TGTTTATCACCCGCGA<br>AGAAGC         | 22 | 50    | 61.5  |

|                        |             |                                    |    |       |       |
|------------------------|-------------|------------------------------------|----|-------|-------|
| nCoV-2019_61_RIGH<br>T | nCoV-2019_1 | ATCACATAGACAACA<br>GGTGC GC        | 22 | 50    | 61.25 |
| nCoV-2019_62_LEFT      | nCoV-2019_2 | GGCACATGGCTTTGA<br>GTTGACA         | 22 | 50    | 61.91 |
| nCoV-2019_62_RIGH<br>T | nCoV-2019_2 | GTTGAACCTTTCTACA<br>AGCCGC         | 22 | 50    | 60.35 |
| nCoV-2019_63_LEFT      | nCoV-2019_1 | TGTTAAGCGTGTGGA<br>CTGGACT         | 22 | 45.45 | 60.16 |
| nCoV-2019_63_RIGH<br>T | nCoV-2019_1 | ACAAACTGCCACCAT<br>CACAACC         | 22 | 50    | 61.85 |
| nCoV-2019_64_LEFT      | nCoV-2019_2 | TCGATAGATATCCTGC<br>TAATTCCATTGT   | 28 | 35.71 | 60.11 |
| nCoV-2019_64_RIGH<br>T | nCoV-2019_2 | AGTCTGTAAAAGTG<br>TTCCAGAGGT       | 25 | 40    | 60.1  |
| nCoV-2019_65_LEFT      | nCoV-2019_1 | GCTGGCTTTAGCTTG<br>TGGGTTT         | 22 | 50    | 61.92 |
| nCoV-2019_65_RIGH<br>T | nCoV-2019_1 | TGTCAGTCATAGAAC<br>AAACACCAATAGT   | 28 | 35.71 | 60.9  |
| nCoV-2019_66_LEFT      | nCoV-2019_2 | GGGTGTGGACATTGC<br>TGCTAAT         | 22 | 50    | 61.21 |
| nCoV-2019_66_RIGH<br>T | nCoV-2019_2 | TCAATTTCCATTGAC<br>TCCTGGGT        | 24 | 41.67 | 60.45 |
| nCoV-2019_67_LEFT      | nCoV-2019_1 | GTTGTCCAACAATTAC<br>CTGAACTTACT    | 28 | 35.71 | 60.43 |
| nCoV-2019_67_RIGH<br>T | nCoV-2019_1 | CAACCTTAGAACTA<br>CAGATAAATCTTGGG  | 30 | 36.67 | 60.4  |
| nCoV-2019_68_LEFT      | nCoV-2019_2 | ACAGGTTTCATCTAAG<br>TGTGTGTGT      | 24 | 41.67 | 60.14 |
| nCoV-2019_68_RIGH<br>T | nCoV-2019_2 | CTCCTTTATCAGAACC<br>AGCACCA        | 23 | 47.83 | 60.31 |
| nCoV-2019_69_LEFT      | nCoV-2019_1 | TGTCGCAAAATATACT<br>CAACTGTGTCA    | 27 | 37.04 | 61.43 |
| nCoV-2019_69_RIGH<br>T | nCoV-2019_1 | TCTTTATAGCCACGGA<br>ACCTCCA        | 23 | 47.83 | 61.14 |
| nCoV-2019_70_LEFT      | nCoV-2019_2 | ACAAAAGAAAATGAC<br>TCTAAAGAGGGTTT  | 29 | 31.03 | 60.13 |
| nCoV-2019_70_RIGH<br>T | nCoV-2019_2 | TGACCTTCTTTTAAAG<br>ACATAACAGCAG   | 28 | 35.71 | 60.27 |
| nCoV-2019_71_LEFT      | nCoV-2019_1 | ACAAATCCAATTCAG<br>TTGTCTTCCTATTC  | 29 | 34.48 | 60.54 |
| nCoV-2019_71_RIGH<br>T | nCoV-2019_1 | TGGAAAAGAAAAGGT<br>AAGAACAAGTCCT   | 27 | 37.04 | 60.8  |
| nCoV-2019_72_LEFT      | nCoV-2019_2 | ACACGTGGTGTTTATT<br>ACCCTGAC       | 24 | 45.83 | 61.04 |
| nCoV-2019_72_RIGH<br>T | nCoV-2019_2 | ACTCTGAACTCACTTT<br>CCATCCAAC      | 25 | 44    | 60.97 |
| nCoV-2019_73_LEFT      | nCoV-2019_1 | CAATTTTGTAAATGATC<br>CATTTTTGGGTGT | 29 | 31.03 | 60.29 |
| nCoV-2019_73_RIGH<br>T | nCoV-2019_1 | CACCAGCTGTCCAAC<br>CTGAAGA         | 22 | 54.55 | 62.45 |
| nCoV-2019_74_LEFT      | nCoV-2019_2 | ACATCACTAGGTTTCA<br>AACTTTACTTGC   | 28 | 35.71 | 60.68 |
| nCoV-2019_74_RIGH<br>T | nCoV-2019_2 | GCAACACAGTTGCTG<br>ATTCTCTTC       | 24 | 45.83 | 60.85 |
| nCoV-2019_75_LEFT      | nCoV-2019_1 | AGAGTCCAACCAACA<br>GAATCTATTGT     | 26 | 38.46 | 60.24 |

|                             |             |                                 |    |       |       |
|-----------------------------|-------------|---------------------------------|----|-------|-------|
| nCoV-2019_75_RIGHT          | nCoV-2019_1 | ACCACCAACCTTAGA<br>ATCAAGATTGT  | 26 | 38.46 | 60.69 |
| nCoV-2019_76_LEFT           | nCoV-2019_2 | AGGGCAAACCTGGAA<br>AGATTGCT     | 22 | 45.45 | 60.76 |
| nCoV-2019_76_LEFT<br>_alt3  | nCoV-2019_2 | GGGCAAACCTGGAAA<br>GATTGCTGA    | 23 | 47.83 | 61.87 |
| nCoV-2019_76_RIGHT          | nCoV-2019_2 | ACACCTGTGCCTGTT<br>AAACCAT      | 22 | 45.45 | 60.42 |
| nCoV-2019_76_RIGHT<br>_alt0 | nCoV-2019_2 | ACCTGTGCCTGTTAA<br>ACCATTGA     | 23 | 43.48 | 60.69 |
| nCoV-2019_77_LEFT           | nCoV-2019_1 | CCAGCAAACCTGTTTGT<br>GGACCTA    | 22 | 50    | 60.75 |
| nCoV-2019_77_RIGHT          | nCoV-2019_1 | CAGCCCTATTAACA<br>GCCTGC        | 22 | 54.55 | 61.59 |
| nCoV-2019_78_LEFT           | nCoV-2019_2 | CAACTTACTCCTACTT<br>GGCGTGT     | 23 | 47.83 | 60.55 |
| nCoV-2019_78_RIGHT          | nCoV-2019_2 | TGTGTACAAAACCTG<br>CCATATTGCA   | 25 | 36    | 60.22 |
| nCoV-2019_79_LEFT           | nCoV-2019_1 | GTGGTGATTCAACTG<br>AATGCAGC     | 23 | 47.83 | 60.92 |
| nCoV-2019_79_RIGHT          | nCoV-2019_1 | CATTTTCATCTGTGAGC<br>AAAGGTGG   | 24 | 45.83 | 60.62 |
| nCoV-2019_80_LEFT           | nCoV-2019_2 | TTGCCTTGGTGATATT<br>GCTGCT      | 22 | 45.45 | 60.89 |
| nCoV-2019_80_RIGHT          | nCoV-2019_2 | TGGAGCTAAGTTGTT<br>TAACAAGCG    | 24 | 41.67 | 60.02 |
| nCoV-2019_81_LEFT           | nCoV-2019_1 | GCACTTGGAACCTT<br>CAAGATGTGG    | 25 | 44    | 61.24 |
| nCoV-2019_81_RIGHT          | nCoV-2019_1 | GTGAAGTTCTTTTCTT<br>GTGCAGGG    | 24 | 45.83 | 60.73 |
| nCoV-2019_82_LEFT           | nCoV-2019_2 | GGGCTATCATCTTATG<br>TCCTTCCCT   | 25 | 48    | 61.52 |
| nCoV-2019_82_RIGHT          | nCoV-2019_2 | TGCCAGAGATGTCAC<br>CTAAATCAA    | 24 | 41.67 | 60.02 |
| nCoV-2019_83_LEFT           | nCoV-2019_1 | TCCTTTGCAACCTGAA<br>TTAGACTCA   | 25 | 40    | 60.46 |
| nCoV-2019_83_RIGHT          | nCoV-2019_1 | TTTGACTCCTTTGAG<br>CACTGGC      | 22 | 50    | 61.33 |
| nCoV-2019_84_LEFT           | nCoV-2019_2 | TGCTGTAGTTGTCTCA<br>AGGGCT      | 22 | 50    | 61.61 |
| nCoV-2019_84_RIGHT          | nCoV-2019_2 | AGGTGTGAGTAAACT<br>GTTACAAACAAC | 27 | 37.04 | 60.36 |
| nCoV-2019_85_LEFT           | nCoV-2019_1 | ACTAGCACTCTCCAA<br>GGGTGTT      | 22 | 50    | 61.03 |
| nCoV-2019_85_RIGHT          | nCoV-2019_1 | ACACAGTCTTTTACTC<br>CAGATTCCC   | 25 | 44    | 60.51 |
| nCoV-2019_86_LEFT           | nCoV-2019_2 | TCAGGTGATGGCACA<br>ACAAGTC      | 22 | 50    | 61.07 |
| nCoV-2019_86_RIGHT          | nCoV-2019_2 | ACGAAAGCAAGAAA<br>AAGAAGTACGC   | 25 | 40    | 61.01 |
| nCoV-2019_87_LEFT           | nCoV-2019_1 | CGACTACTAGCGTGC<br>CTTTGTA      | 22 | 50    | 60.16 |
| nCoV-2019_87_RIGHT          | nCoV-2019_1 | ACTAGTTCCATTGTT<br>CAAGGAGC     | 24 | 45.83 | 60.81 |
| nCoV-2019_88_LEFT           | nCoV-2019_2 | CCATGGCAGATTCCA<br>ACGGTAC      | 22 | 54.55 | 61.58 |



|                             |             |                                    |    |       |       |
|-----------------------------|-------------|------------------------------------|----|-------|-------|
| nCoV-2019_88_RIGHT          | nCoV-2019_2 | TGGTCAGAATAGTGC<br>CATGGAGT        | 23 | 47.83 | 61.4  |
| nCoV-2019_89_LEFT           | nCoV-2019_1 | GTACGCGTTCCATGT<br>GGTCATT         | 22 | 50    | 61.5  |
| nCoV-2019_89_LEFT<br>_alt2  | nCoV-2019_1 | CGCGTTCCATGTGGT<br>CATTCAA         | 22 | 50    | 62.01 |
| nCoV-2019_89_RIGHT          | nCoV-2019_1 | ACCTGAAAGTCAACG<br>AGATGAAACA      | 25 | 40    | 60.91 |
| nCoV-2019_89_RIGHT<br>_alt4 | nCoV-2019_1 | ACGAGATGAAACATC<br>TGTTGTCACT      | 25 | 40    | 60.74 |
| nCoV-2019_90_LEFT           | nCoV-2019_2 | ACACAGACCATTCCA<br>GTAGCAGT        | 23 | 47.83 | 61.58 |
| nCoV-2019_90_RIGHT          | nCoV-2019_2 | TGAAATGGTGAATTG<br>CCCTCGT         | 22 | 45.45 | 60.82 |
| nCoV-2019_91_LEFT           | nCoV-2019_1 | TCACTACCAAGAGTG<br>TGTTAGAGGT      | 25 | 44    | 60.93 |
| nCoV-2019_91_RIGHT          | nCoV-2019_1 | TTCAAGTGAGAACCA<br>AAAGATAATAAGCA  | 29 | 31.03 | 60.03 |
| nCoV-2019_92_LEFT           | nCoV-2019_2 | TTTGTGCTTTTAGCC<br>TTTCTGCT        | 24 | 37.5  | 60.14 |
| nCoV-2019_92_RIGHT          | nCoV-2019_2 | AGGTTCTGGCAATT<br>AATTGTAAAAGG     | 27 | 37.04 | 60.53 |
| nCoV-2019_93_LEFT           | nCoV-2019_1 | TGAGGCTGGTTCTAA<br>ATCACCCA        | 23 | 47.83 | 61.59 |
| nCoV-2019_93_RIGHT          | nCoV-2019_1 | AGGTCTTCTTGCCAT<br>GTTGAG          | 22 | 50    | 60.55 |
| nCoV-2019_94_LEFT           | nCoV-2019_2 | GGCCCCAAGGTTTAC<br>CCAATAA         | 22 | 50    | 60.56 |
| nCoV-2019_94_RIGHT          | nCoV-2019_2 | TTTGGCAATGTTGTTC<br>CTTGAGG        | 23 | 43.48 | 60.18 |
| nCoV-2019_95_LEFT           | nCoV-2019_1 | TGAGGGAGCCTTGAA<br>TACACCA         | 22 | 50    | 61.1  |
| nCoV-2019_95_RIGHT          | nCoV-2019_1 | CAGTACGTTTTTGCC<br>GAGGCTT         | 22 | 50    | 61.95 |
| nCoV-2019_96_LEFT           | nCoV-2019_2 | GCCAACAACAACAAG<br>GCCAAAC         | 22 | 50    | 61.82 |
| nCoV-2019_96_RIGHT          | nCoV-2019_2 | TAGGCTCTGTTGGTG<br>GGAATGT         | 22 | 50    | 61.36 |
| nCoV-2019_97_LEFT           | nCoV-2019_1 | TGGATGACAAAGATC<br>CAAATTTCAAAGA   | 28 | 32.14 | 60.22 |
| nCoV-2019_97_RIGHT          | nCoV-2019_1 | ACACACTGATTAAG<br>ATTGCTATGTGAG    | 28 | 35.71 | 60.17 |
| nCoV-2019_98_LEFT           | nCoV-2019_2 | AACAATTGCAACAAT<br>CCATGAGCA       | 24 | 37.5  | 60.5  |
| nCoV-2019_98_RIGHT          | nCoV-2019_2 | TTCTCCTAAGAAGCTA<br>TAAAAATCACATGG | 30 | 33.33 | 60.01 |

**Supplementary Table 4.** We used the ARTIC Network v3 primers to amplify cDNA. The primer names, primer pools, sequences, % GC content, and ideal primer melting temp are included. These primers can also be found on the 'artic-network' GitHub page – <https://github.com/artic-network/primer-schemes/tree/master/nCoV-2019/V3>.
